# Supplementary material
Source: PubMed Central journal article supplement (PMC2527597)
Supplement: NIHMS61635-supplement-si20060929_094.pdf [file NIHMS61635-supplement-si20060929_094.pdf]

# Supporting Information

## Highly Efficient Synthesis of Azabicyclo[x.y.0]alkane Amino Acids and Congeners by Means of Rh-Catalyzed Cyclohydrocarbonylation

Wen-Hua Chiou, Nobihiro Mizutani, and Iwao Ojima\*

*Department of Chemistry, State University of New York at Stony Brook,  
Stony Brook, New York 11794-3400*

[iojima@notes.cc.sunysb.edu](mailto:iojima@notes.cc.sunysb.edu)

|                                                                                                                                                                                                                                                                                                  |     |
|--------------------------------------------------------------------------------------------------------------------------------------------------------------------------------------------------------------------------------------------------------------------------------------------------|-----|
| General methods and materials                                                                                                                                                                                                                                                                    | S2  |
| Characterization data for the unsaturated dipeptide derivatives <b>1a-k</b>                                                                                                                                                                                                                      | S2  |
| Full assignments of NMR data for 1-azabicyclic products <b>5a-k</b> and determination of stereochemistry by NMR spectroscopy                                                                                                                                                                     | S8  |
| Molecular mechanics data for the stability of diastereomer pairs, <b>5a</b> and <b>5b</b>                                                                                                                                                                                                        | S29 |
| X-ray crystallographic structures of (3 <i>S</i> ,6 <i>S</i> ,10 <i>S</i> )- <b>5d</b> (Figure S1), (3 <i>S</i> ,6 <i>S</i> ,9 <i>R</i> )- <b>5h</b> (Figure S2), (3 <i>R</i> ,6 <i>R</i> ,9 <i>S</i> )- <b>5h</b> (Figure S3), and (3 <i>S</i> ,6 <i>S</i> ,9 <i>S</i> )- <b>5j</b> (Figure S4) | S30 |
| Single crystal X-ray crystallography data                                                                                                                                                                                                                                                        | S31 |

**General Methods:** NMR spectra, i.e.,  $^1\text{H}$ ,  $^{13}\text{C}$ , DEPT, COSY, HMQC, HMBC, ROESY, NOESY, NOE-difference, were recorded on a 300, 400, 500 or 600 MHz NMR spectrometers, which provided all necessary data for the full assignment of each compound. Specific rotations were measured on a polarimeter. Melting points were measured on a capillary melting point apparatus. High-resolution mass spectrometry (HRMS) analyses were conducted at the Mass Spectrometry Laboratory of the University of Illinois at Urbana-Champaign. GC-MS analyses were performed on a GC system equipped with a capillary column (50 m X 0.25 mm, 0.25  $\mu\text{m}$ ) and a mass selective detector. LC-MS analyses were carried out on a liquid chromatograph mass spectrometer. IR spectra were measured on a FT-IR spectrophotometer. TLC analyses were performed on silica gel (230-400 mesh) and were visualized with UV light, iodine chamber, 10% sulfuric acid or 10% PMA solution. Purifications were performed by flash chromatography on silica gel (230-400 mesh).

**Materials:** Chemicals, reagents and solvents were commercially available. The reagents were used as received. Dichloromethane, pyridine, 1,4-dioxane, acetonitrile, 1,2-dichloroethane, DMSO and methanol were dried before use by distillation over calcium hydride under nitrogen or argon. Ether and THF were dried before use by distillation over sodium-benzophenone ketyl under nitrogen or argon. Toluene, benzene and dimethyl sulfide were dried by distillation over sodium metal under nitrogen or argon before use. Dry DMF was commercially available and used without further purification. A solvent drying and degassing apparatus provided an alternative source of dry toluene, THF, ether, and dichloromethane. The glasses were dried in a 110  $^\circ\text{C}$  oven and allowed to cool to room temperature in a desiccator over calcium sulfate and assembled under inert gas nitrogen or argon atmosphere.

### **Characterization data for the unsaturated dipeptide derivatives 1a-k**

***N-tert-Butoxycarbonyl-(S)-seryl-(S)-allylglycine methyl ester (S,S)-1a:***<sup>1</sup> 76% yield;  $^1\text{H-NMR}$  (400 MHz, 25  $^\circ\text{C}$ ,  $\text{CDCl}_3$ )  $\delta$  1.38(s, 9H), 2.05 (d,  $J = 6.8$  Hz, 1H), 2.42-2.62(m, 2H), 3.61-3.69 (m, 1H), 3.72 (s, 3H), 3.91 (m, 1H), 4.16 (m, 1H), 4.57 (dd,  $J = 12.8, 6.8$  Hz, 1H), 5.06 (m, 2H), 5.63 (m, 2H), 7.24 (br, 1H).  $^{13}\text{C-NMR}$  (100 MHz, 25  $^\circ\text{C}$ ,  $\text{CDCl}_3$ )  $\delta$  28.2, 35.9, 51.9, 52.4, 55.1, 62.7, 80.3, 119.1, 132.0, 155.9, 171.9, 174.2.

***N-tert-Butoxycarbonyl-(S)-seryl-(R)-allylglycine methyl ester, (S,R)-1a:***<sup>1</sup> 66% yield;  $^1\text{H-NMR}$  (400 MHz, 25  $^\circ\text{C}$ ,  $\text{CDCl}_3$ )  $\delta$  1.38(s, 9H), 1.99 (d,  $J = 6.8$  Hz, 1H), 2.48(m, 2H), 3.64 (m, 1H), 3.67 (s, 3H),

3.95 (m, 1H), 4.16 (m, 1H), 4.58 (dd,  $J = 12.8, 6.8$  Hz, 1H), 5.08 (m, 2H), 5.62 (dddd,  $J = 17.2, 10, 7.2, 7.2$  Hz, 1H), 5.73 (d,  $J = 6.0$  Hz, 1H), 7.19 (br, 1H).  $^{13}\text{C}$ -NMR (100 MHz, 25 °C,  $\text{CDCl}_3$ )  $\delta$  28.2, 36.0, 51.7, 52.4, 55.5, 62.7, 80.3, 119.2, 131.9, 155.9, 171.1, 172.0.

***N*-tert-Butoxycarbonyl-(*S*)-seryl-*O*-benzyl-(*S*)-allylglycinol, (*S,S*)-1b:**<sup>2</sup> 85% yield;  $^1\text{H}$ -NMR (400 MHz, 25 °C,  $\text{CDCl}_3$ )  $\delta$  1.41, (s, 9H), 2.01 (d,  $J = 6.8$  Hz, 1H), 2.23-2.38 (m, 2H), 3.43 (dd,  $J = 7.2, 4.8$  Hz, 1H), 3.47 (dd,  $J = 7.2, 4.4$  Hz, 1H), 3.55-3.60 (m, 1H), 3.99 (d,  $J = 11.0$  Hz, 1H), 4.07-4.14 (m, 2H), 4.45 (d,  $J = 12.4$  Hz, 1H), 4.51 (d,  $J = 12.0$  Hz, 1H), 5.01-5.06 (m, 2H), 5.62 (brs, 1H), 5.70 (dddd,  $J = 17.2, 10.0, 6.8, 6.8$  Hz, 1H), 6.86(brs, 1H), 7.26-7.34(m, 5H);  $^{13}\text{C}$ -NMR (100 MHz, 25 °C,  $\text{CDCl}_3$ )  $\delta$  28.5, 36.2, 48.9, 55.2, 63.1, 70.8, 73.4, 80.6, 118.1, 127.9, 128.0, 128.6, 134.3, 138.1, 156.3, 171.2.

***N'*-tert-Butoxycarbonyl-(*R*)-seryl-*O*-benzyl-(*S*)-allylglycinol, (*R,S*)-1b:**<sup>3</sup> 81% yield;  $^1\text{H}$ -NMR (400 MHz, 25 °C,  $\text{CDCl}_3$ )  $\delta$  1.41 (s, 9H), 2.03 (d,  $J = 6.8$  Hz, 1H), 2.26-2.39 (m, 2H), 3.42 (dd,  $J = 7.2, 4.4$  Hz, 1H), 3.47 (dd,  $J = 7.2, 4.4$  Hz, 1H), 3.61 (dd,  $J = 11.6, 4.8$  Hz, 1H), 4.01 (d,  $J = 10.8$  Hz, 1H), 4.07-4.16 (m, 2H), 4.45 (d,  $J = 12.0$  Hz, 1H), 4.51 (d,  $J = 12.0$  Hz, 1H), 5.03-5.09 (m, 2H), 5.62 (d,  $J = 7.2$  Hz, 1H), 5.72 (dddd,  $J = 17.2, 10.8, 7.2, 7.2$  Hz, 1H), 6.73 (brs, 1H), 7.24-7.35 (m, 5H);  $^{13}\text{C}$ -NMR (100 MHz, 25 °C,  $\text{CDCl}_3$ )  $\delta$  28.5, 36.2, 48.8, 55.3, 63.3, 70.9, 73.4, 80.7, 118.2, 127.9, 128.0, 128.6, 134.3, 138.1, 156.3, 171.1.

***N*-tert-Butoxycarbonyl-(*S*)-homoseryl-(*S*)-allylglycine methyl ester, (*S,S*)-1c:**

First, *N*-(tert-butoxycarbonyl)-*O*-(tert-butyldimethylsilyl)-(*S*)-homoseryl-(*S*)-allylglycine methyl ester, (*S,S*)-1c', was prepared by coupling *N*-tert-butoxycarbonyl-(*S*)-homoserine with methyl (*S*)-allylglycinate hydrochloride under the standard conditions described in the Experimental Section.

(*S,S*)-1c': 272 mg, 90%;  $^1\text{H}$ -NMR (400 MHz, 25 °C,  $\text{CDCl}_3$ )  $\delta$  -0.04 (s, 6H), 0.80 (s, 9H), 1.33 (s, 9H), 1.85(m, 2H), 2.38 (m, 1H), 2.48 (m, 1H), 3.61 (s, 3H), 3.69 (m, 2H), 4.13 (m, 1H), 4.53 (dd,  $J = 13.2; 6.0$  Hz, 1H), 5.06 (m, 2H), 5.63 (m, 1H), 5.95 (m, 1H); 6.94 (m, 1H);  $^{13}\text{C}$ -NMR (100 MHz, 25 °C,  $\text{CDCl}_3$ )  $\delta$  -5.7, 18.1, 25.9, 28.3, 33.6, 36.5, 51.8, 52.2, 53.7, 60.7, 79.7, 118.9, 132.3, 155.8, 171.7, 171.74.

Next, to a cooled solution of (*S,S*)-1c' (263 mg, 0.59 mmol) in pyridine (7.5 mL) and acetonitrile (7.5 mL) in an ice bath, hydrogen fluoride-pyridine (3 mL) was slowly added via a syringe. The reaction was exothermic. Ice bath was removed when the addition was completed. The reaction mixture was stirred at room temperature for 3 h. When the reaction was completed, saturated aqueous  $\text{NaHCO}_3$  (100 mL) was

slowly added to the mixture. The reaction mixture was extracted with EtOAc (20 mL X 3). The combined organic layer was washed with saturated cupric sulfate solution (20 mL X 3), water (20 mL X 1), brine (20 mL X 1), and dried over MgSO<sub>4</sub>. Then, the dried solution was concentrated under reduced pressure to give crude product. The crude product was purified by flash column chromatography on silica gel, using EtOAc/*n*-hexane as a eluant, to give (*S,S*)-**1c** (158 mg, 80% yield) as colorless liquid: <sup>1</sup>H-NMR (400 MHz, 25 °C, CDCl<sub>3</sub>) δ 1.35 (s, 9H), 1.66 (m, 1H), 1.99 (m, 2H); 2.42 (m, 1H), 2.48 (m, 1H), 3.64 (m, 5H), 4.31 (m, 1H), 4.55 (dd, *J* = 12.8; 7.2 Hz, 1H), 5.02 (m, 2H), 5.63 (m, 2H), 7.24 (d, *J* = 7.2 Hz, 1H); <sup>13</sup>C-NMR (100 MHz, 25 °C, CDCl<sub>3</sub>) δ 28.3, 36.2, 36.2, 51.4, 52.0, 52.4, 58.5, 80.2, 119.0, 132.4, 156.5, 172.0, 172.2. MS (FAB) *m/z* calcd for C<sub>15</sub>H<sub>26</sub>N<sub>2</sub>O<sub>6</sub>•H<sup>+</sup>, 331.1871; found, 331.08.

**Methyl β-*tert*-butoxycarbonylamino-*N*-*tert*-butoxycarbonyl-(*S*)-alanyl-(*S*)-allylglycinate, (*S,S*)-**1d****:<sup>1</sup> 82% yield; <sup>1</sup>H NMR (300 MHz, CDCl<sub>3</sub>) δ 1.44 (s, 9H), 1.45 (s, 9H), 2.44-2.65 (m, 2H), 3.49 (m, 2H), 3.74 (s, 3H), 4.18 (m, 1H), 4.62 (m, 1H), 5.10-5.14 (m, 3H), 5.61-5.75 (m, 2H), 7.11 (bs, 1H). HRMS (FAB) *m/z* calcd for C<sub>19</sub>H<sub>33</sub>N<sub>3</sub>O<sub>7</sub>•H<sup>+</sup> 416.2397; found, 416.2396 (Δ = - 0.1 ppm).

***N*-Benzyloxycarbonyl-*S*-trityl-(*R*)-cysteinyl-(*S*)-allylglycine methyl ester, (*R,S*)-**1e****:<sup>1</sup> 81% yield; <sup>1</sup>H-NMR (400 MHz, CDCl<sub>3</sub>) δ 2.42 (m, 1H), 2.52 (m, 1H), 2.58 (dd, *J* = 13.0, 5.6 Hz, 1H), 2.74 (dd, *J* = 13.0, 7.6 Hz, 1H), 3.66 (s, 3H), 3.85 (m, 1H), 4.57 (dd, *J* = 13.0, 6.0 Hz, 1H), 5.05 (m, 4H), 5.34 (d, *J* = 7.6 Hz, 1H), 5.61 (m, 1H), 6.58 (d, *J* = 6.4 Hz, 1H), 7.30 (m, 20H). <sup>13</sup>C-NMR (100 MHz, CDCl<sub>3</sub>) δ 33.6, 36.1, 51.7, 52.1, 53.7, 66.8, 67.0, 119.0, 126.7, 127.8, 127.9, 127.9, 128.3, 129.4, 131.8, 136.0, 144.2, 155.7, 169.7, 171.3.

***N*-Benzyloxycarbonyl-*S*-trityl-(*S*)-homocysteinyl-(*S*)-allylglycine methyl ester, (*S,S*)-**1f****:<sup>2</sup> 82% yield; <sup>1</sup>H-NMR (400 MHz, 25 °C, CDCl<sub>3</sub>) δ 1.60 (m, 1H), 1.75 (m, 1H), 2.29 (m, 2H), 2.26 (m, 1H), 2.25 (m, 1H), 3.69 (s, 3H), 4.22 (ddd, *J* = 8.0; 8.0; 13.5 Hz, 1H); 4.58 (ddd, *J* = 6.6; 6.6; 13.0 Hz, 1H); 5.07 (m, 4H), 5.47 (d, *J* = 8.0 Hz, 1H), 5.63 (m, 1H), 6.80 (d, *J* = 8.0 Hz, 1H), 7.20 (m, 20H); <sup>13</sup>C-NMR (100 MHz, 25 °C, CDCl<sub>3</sub>) δ 28.0, 31.8, 36.3, 51.8, 52.3, 54.0, 66.9, 67.0, 119.2, 126.7, 127.9, 128.0, 128.1, 128.5, 129.6, 132.0, 136.3, 144.7, 156.1, 171.1, 171.7.

***N*-*tert*-Butoxycarbonyl-(2*S*,3*R*)-threonyl-(*S*)-allylglycine methyl ester, (*S,R,S*)-**1g****:<sup>3</sup> 92% yield; <sup>1</sup>H-NMR (400 MHz, 25 °C, CDCl<sub>3</sub>) δ 1.17 (d, *J* = 6.4 Hz, 3H), 1.44 (s, 9H), 1.45 (brs, 1H), 2.44-2.61 (m, 2H), 3.73 (s, 3H), 4.06 (d, *J* = 6.0 Hz, 1H), 4.32 (dddd, *J* = 6.8, 6.8, 6.8, 2.4 Hz, 1H), 4.61 (q, *J* = 6.8 Hz,

1H), 5.09-5.13 (m, 2H), 5.43 (d,  $J = 7.6$  Hz, 1H), 5.65 (dddd,  $J = 17.2, 9.6, 7.2, 7.2$  Hz, 1H), 7.00 (d,  $J = 6.0$  Hz, 1H).  $^{13}\text{C}$ -NMR (100 MHz, 25 °C,  $\text{CDCl}_3$ )  $\delta$  18.3, 28.5, 36.4, 52.0, 52.7, 58.0, 67.0, 80.6, 119.6, 132.2, 156.6, 171.6, 0.99.

***N*-tert-Butoxycarbonyl-(2*R*,3*S*)-threonyl-(*S*)-allylglycine methyl ester, (*R*,*S*,*S*)-1g:**<sup>3</sup> 73% yield;  $^1\text{H}$ -NMR (400 MHz, 25 °C,  $\text{CDCl}_3$ )  $\delta$  1.18 (d,  $J = 6.4$  Hz, 3H), 1.44 (s, 9H), 1.45 (brs, 1H), 2.47-2.57 (m, 2H), 3.72 (s, 3H), 4.03 (d,  $J = 7.6$  Hz, 1H), 4.34-4.40 (m, 1H), 4.60 (q,  $J = 6.8$  Hz, 1H), 5.11-5.16 (m, 2H), 5.43 (d,  $J = 7.5$  Hz, 1H), 5.66 (dddd,  $J = 16.8, 9.6, 7.2, 7.2$  Hz, 1H), 6.99 (brs, 1H);  $^{13}\text{C}$ -NMR (100 MHz, 25 °C,  $\text{CDCl}_3$ )  $\delta$  18.6, 28.4, 36.2, 51.9, 52.6, 58.9, 67.1, 80.4, 119.5, 132.2, 156.5, 171.5, 172.2.

***N*-tert-Butoxycarbonyl-(2*S*,3*S*)-threonyl-(*S*)-allylglycine methyl ester, (*S*,*S*,*S*)-1g:**<sup>3</sup> 80% yield;  $^1\text{H}$ -NMR (400 MHz, 25 °C,  $\text{CDCl}_3$ )  $\delta$  1.15 (d,  $J = 6.4$  Hz, 3H), 1.34 (s, 9H), 2.37-2.53 (m, 2H), 3.64 (s, 3H), 3.85 (quintet,  $J = 6.0$  Hz, 1H), 3.92 (brs, 1H), 4.00-4.06 (m, 1H), 4.53 (ddd,  $J = 7.2, 7.2, 12.8$  Hz, 1H), 5.00-5.05 (m, 2H), 5.60 (dddd,  $J = 6.8, 6.8, 10.0, 17.2$  Hz, 1H), 5.67 (d,  $J = 7.0$  Hz, 1H), 7.20 (d,  $J = 6.4$  Hz, 1H);  $^{13}\text{C}$ -NMR (100 MHz, 25 °C,  $\text{CDCl}_3$ )  $\delta$  19.5, 28.3, 35.9, 52.1, 52.5, 58.9, 69.2, 80.1, 119.2, 132.2, 156.1, 171.2, 172.1.

***N*-tert-Butoxycarbonyl-(2*R*,3*R*)-threonyl-(*S*)-allylglycine methyl ester, (*R*,*R*,*S*)-1g:**<sup>3</sup> 65% yield;  $^1\text{H}$ -NMR (400 MHz, 25 °C,  $\text{CDCl}_3$ )  $\delta$  1.19 (d,  $J = 6.4$  Hz, 3H), 1.38 (s, 9H), 2.41-2.57 (m, 2H), 3.68 (s, 3H), 3.86 (brs, 1H), 3.93 (quintet,  $J = 5.6$  Hz, 1H), 4.09 (brs, 1H), 4.60 (ddd,  $J = 7.2, 7.2, 12.8$  Hz, 1H), 5.05-5.10 (m, 2H), 5.64 (dddd,  $J = 6.8, 6.8, 10.0, 17.2$  Hz, 1H), 5.68 (d,  $J = 7.2$  Hz, 1H), 7.22 (brs, 1H);  $^{13}\text{C}$ -NMR (100 MHz, 25 °C,  $\text{CDCl}_3$ )  $\delta$  19.6, 28.4, 36.3, 51.9, 52.5, 58.9, 69.1, 80.4, 119.3, 132.3, 156.3, 171.0, 172.0.

***N*-tert-Butoxycarbonyl-(*S*)-seryl-(*S*)-vinylglycine methyl ester, (*S*,*S*)-1h:**<sup>2</sup> 80% yield;  $^1\text{H}$ -NMR (400 MHz, 25 °C,  $\text{CDCl}_3$ )  $\delta$  1.35 (s, 9H), 3.60-3.70 (m, 1H), 3.67 (s, 3H), 3.81 (brs, 1H), 3.84-3.91 (m, 1H), 4.23 (brs, 1H), 5.03-5.07 (m, 1H), 5.16-5.32 (m, 2H), 5.80-5.89 (m, 2H), 7.50 (br, 1H);  $^{13}\text{C}$ -NMR (100 MHz, 25 °C,  $\text{CDCl}_3$ )  $\delta$  28.3, 52.8, 54.6, 55.5, 62.8, 80.3, 118.0, 131.6, 156.1, 170.6, 171.1.

***N*-tert-Butoxycarbonyl-(*R*)-seryl-(*S*)-vinylglycine methyl ester, (*R*,*S*)-1h:**<sup>2</sup> 86% yield;  $^1\text{H}$ -NMR (400 MHz, 25 °C,  $\text{CDCl}_3$ )  $\delta$  1.36 (s, 9H), 3.60-3.70 (m, 2H), 3.67 (s, 3H), 3.89-3.96 (m, 1H), 4.22 (brs,

1H), 5.05-5.08 (m, 1H), 5.17-5.31 (m, 2H), 5.80-5.89(m, 2H), 7.42 (br, 1H); <sup>13</sup>C-NMR (100 MHz, 25 °C, CDCl<sub>3</sub>) δ 28.3, 52.8, 54.7, 55.8, 62.8, 80.5, 118.0, 131.6, 156.2, 170.8, 171.2.

***N*-*tert*-Butoxycarbonyl-(*S*)-seryl-*O*-benzyl-(*R*)-vinylglycinol, (*S,R*)-1i:**<sup>2</sup> 54% yield; <sup>1</sup>H-NMR (400 MHz, 25 °C, CDCl<sub>3</sub>) δ 1.40 (s, 9H), 3.46 (dd, *J* = 5.2, 9.6 Hz, 1H), 3.48 (dd, *J* = 4.8, 10.0 Hz, 1H), 3.40-3.70 (brs, 1H), 3.62 (m, 1H), 3.94 (d, *J* = 8.8 Hz, 1H), 4.12 (m, 1H), 4.46 (d, *J* = 12.0 Hz, 1H), 4.50 (d, *J* = 12.0 Hz, 1H), 4.65 (m, 1H), 5.14 (ddd, *J* = 1.2, 1.2, 10.2 Hz, 1H), 5.22 (ddd, *J* = 1.2, 1.2, 17.2 Hz, 1H), 5.71 (d, *J* = 6.4 Hz, 1H), 5.80 (ddd, *J* = 5.2; 10.8; 16.8 Hz, 1H), 7.04 (d, *J* = 4.8 Hz, 1H), 7.22-7.32 (m, 5H); <sup>13</sup>C-NMR (100 MHz, 25 °C, CDCl<sub>3</sub>) δ 28.4, 51.2, 55.7, 62.9, 71.6, 73.3, 80.5, 116.4, 127.8, 127.9, 128.5, 135.2, 137.8, 156.2, 170.9.

***N*-*tert*-Butoxycarbonyl-(*R*)-seryl-*O*-benzyl-(*R*)-vinylglycinol, (*R,R*)-1i:**<sup>2</sup> 61% yield; <sup>1</sup>H-NMR (400 MHz, 25 °C, CDCl<sub>3</sub>) δ 1.41 (s, 9H), 3.50 (d, *J* = 4.8 Hz, 2H), 3.62 (m, 2H), 3.96 (d, *J* = 8.8 Hz, 1H), 4.19 (m, 1H), 4.47 (d, *J* = 12.4 Hz, 1H), 4.53 (d, *J* = 12.4 Hz, 1H), 4.65 (m, 1H), 5.13 (d, *J* = 10.2 Hz, 1H), 5.22 (d, *J* = 17.2 Hz, 1H), 5.80 (ddd, *J* = 5.2; 10.4; 16.4 Hz, 2H), 7.14 (d, *J* = 7.2 Hz, 1H), 7.24-7.34 (m, 5H); <sup>13</sup>C-NMR (100 MHz, 25 °C, CDCl<sub>3</sub>) δ 28.4, 51.2, 55.4, 62.9, 71.6, 73.3, 80.4, 116.3, 127.8, 127.9, 128.5, 135.3, 137.8, 156.2, 171.1.

***N*-[(*S*)-2-Aminobut-3-enyl]-(*N'*-*tert*-butoxycarbonyl)-(*S*)-serinamide, (*S,S*)-1j:**<sup>2</sup> <sup>1</sup>H-NMR (500 MHz, 25 °C, CDCl<sub>3</sub>) δ 1.19 (d, *J* = 7.0 Hz, 3H), 1.41 (s, 9H), 3.01 (brs, 1H), 3.64 (m, 1H), 4.00 (d, *J* = 11 Hz, 1H), 4.12 (brs, 1H), 4.50 (m, 1H), 5.04 (d, *J* = 10.5 Hz, 1H), 5.13 (d, *J* = 17.5 Hz, 1H), 5.68 (d, *J* = 6.8 Hz, 1H), 5.78 (ddd, *J* = 5.0; 10.5; 17.5 Hz, 1H), 6.80 (m, 1H); <sup>13</sup>C-NMR (75 MHz, 25 °C, CDCl<sub>3</sub>) δ 20.4, 28.5, 47.1, 55.2, 63.0, 80.7, 114.4, 139.2, 156.5, 170.7.

***N*-[(*S*)-2-Aminobut-3-enyl]-(*N'*-*tert*-butoxycarbonyl)-(*R*)-serinamide, (*R,S*)-1j:**<sup>2</sup> <sup>1</sup>H-NMR (400 MHz, 25 °C, CDCl<sub>3</sub>) δ 1.19 (d, *J* = 6.9 Hz, 3H), 1.40 (s, 9H), 3.64 (brs, 2H), 4.00 (d, *J* = 8.0 Hz, 1H), 4.11 (m, 1H), 4.50 (m, 1H), 5.02 (d, *J* = 10.8 Hz, 1H), 5.10 (d, *J* = 17.2 Hz, 1H), 5.70 (d, *J* = 8.0 Hz, 1H), 5.78 (ddd, *J* = 4.8; 10.8; 16.8 Hz, 1H), 6.80 (m, 1H); <sup>13</sup>C-NMR (100 MHz, 25 °C, CDCl<sub>3</sub>) δ 20.5, 28.5, 47.0, 55.1, 62.9, 80.7, 114.3, 139.2, 156.5, 170.8.

***N*-Allyl-(*N'*-*tert*-butoxycarbonyl)-(*S*)-serinamide, (*S*)-1k:**<sup>4</sup> 69% yield; <sup>1</sup>H-NMR (400 MHz, 25 °C, CDCl<sub>3</sub>) δ 1.40 (s, 9H), 3.27 (brs, 1H), 3.58-3.70 (m, 1H), 3.79-3.94 (m, 2H), 4.08 (d, *J* = 10.4 Hz, 1H),

4.14 (brs, 1H), 5.11 (d,  $J = 10.4$  Hz, 1H), 5.17 (d,  $J = 17.2$  Hz, 1H), 5.62 (brs, 1H), 5.78 (dddd,  $J = 5.6, 5.6, 10.8, 10.8$  Hz, 1H), 6.83 (brs, 1H);  $^{13}\text{C}$ -NMR (100 MHz, 25 °C,  $\text{CDCl}_3$ )  $\delta$  28.5, 41.9, 55.0, 63.1, 80.9, 116.5, 133.8, 156.6, 171.6.

### Characterization data for (S,S)-2a, (S,S)-6b, (R,S)-6b, (S)-7h and (R)-7h

***N*-tert-Butoxycarbonyl-(S)-seryl-(S)-6-oxonorvaline methyl ester, (S,S)-2a:**<sup>2</sup> Colorless oil;  $^1\text{H}$ -NMR (400 MHz, 25 °C,  $\text{CDCl}_3$ )  $\delta$  1.41 (s, 9H), 1.56-1.73 (m, 3H), 1.82-1.91 (m, 1H), 2.43-2.47 (m, 2H), 3.62-3.66 (m, 1H), 3.71 (s, 3H), 3.70-3.73 (m, 1H), 4.00 (dd,  $J = 11.2, 3.6$  Hz, 1H), 4.18 (brs, 1H), 4.52-4.58 (m, 1H), 5.64 (d,  $J = 6.4$  Hz, 1H), 7.27 (d,  $J = 1.6$  Hz, 1H), 9.70 (t,  $J = 1.2$  Hz, 1H);  $^{13}\text{C}$ -NMR (100 MHz, 25 °C,  $\text{CDCl}_3$ )  $\delta$  17.7, 28.2, 31.2, 42.9, 52.0, 52.6, 55.1, 62.8, 80.4, 156.0, 171.3, 172.4, 201.7.

***N*-[*N*-tert-Butoxycarbonyl-(R)-seryl]-(S)-2-benzyloxymethyl-5,6-didehydropiperidine, (R,S)-6b:**<sup>2</sup> Colorless oil;  $^1\text{H}$ -NMR (400 MHz, 25 °C,  $\text{CDCl}_3$ )  $\delta$  1.28-1.41 (m, 2H), 1.41 (s, 9H), 1.54-1.61 (m, 1H), 1.69-1.79 (m, 1H), 3.44-3.48 (m, 2H), 3.64 (dd,  $J = 9.2, 3.6$  Hz, 1H), 4.01-4.21 (m, 3H), 4.48 (d,  $J = 9.6$  Hz, 1H), 4.49-4.61 (m, 1H), 4.54 (d,  $J = 9.6$  Hz, 1H), 4.91-5.01 (m, 1H), 5.54 (brs, 1H), 6.66 (brs, 1H), 7.29-7.36 (m, 20H).

***N*-[*N*-tert-Butoxycarbonyl-(S)-seryl]-(S)-2-benzyloxymethyl-5,6-didehydropiperidine, (S,S)-6b:**<sup>2</sup> Colorless oil;  $^1\text{H}$ -NMR (400 MHz, 25 °C,  $\text{CDCl}_3$ )  $\delta$  1.27-1.41 (m, 2H), 1.41 (s, 9H), 1.53-1.61 (m, 1H), 1.69-1.76 (m, 1H), 3.42-3.46 (m, 2H), 3.66 (dd,  $J = 9.2, 3.6$  Hz, 1H), 4.07-4.21 (m, 3H), 4.48 (d,  $J = 9.6$  Hz, 1H), 4.49-4.61 (m, 1H), 4.54 (d,  $J = 9.6$  Hz, 1H), 4.91-5.01 (m, 1H), 5.57 (brs, 1H), 6.65 (brs, 1H), 7.29-7.36 (m, 20H).

***N*-tert-Butoxycarbonyl-(S)-seryl-2(R/S)-3(R/S)-4-oxovaline methyl ester, (S)-7h:**<sup>2</sup> Colorless oil, 21 % yield;  $^1\text{H}$ -NMR (400 MHz, 25 °C,  $\text{CDCl}_3$ )  $\delta$  0.95-1.20 (m, 3H), 1.39-1.51 (m, 9H), 2.92-3.28 (m, 1H), 3.60-3.80 (m, 4H), 4.00-4.62 (m, 3H), 4.92-5.10 (m, 1H), 5.56-5.74 (m, 1H), 7.26-7.46 (m, 1H), 9.55-9.72 (m, 1H);  $^{13}\text{C}$  NMR (100 MHz, 25 °C,  $\text{CDCl}_3$ )  $\delta$  6-8, 28-29, 47-48, 51-52, 53-54, 55-56, 62-63, 80-81, 155-156, 170-171, 171-172, 200-202.

***N*-tert-Butoxycarbonyl-(*R*)-seryl-2(*R/S*)-3(*R/S*)-4-oxovaline methyl ester, (*R*)-7h:**<sup>2</sup> Colorless oil, 23 % yield; <sup>1</sup>H-NMR (400 MHz, 25 °C, CDCl<sub>3</sub>) δ 1.04-1.26 (m, 3H), 1.40-1.51 (m, 9H), 2.20-2.80 (m, 1H), 2.92-3.26 (m, 1H), 3.62-3.80 (m, 4H), 3.98-4.24 (m, 2H), 4.90-5.12 (m, 1H), 5.55-5.72 (m, 1H), 7.24-7.48 (m, 1H), 9.58-9.74 (m, 1H); <sup>13</sup>C NMR (100 MHz, 25 °C, CDCl<sub>3</sub>) δ 9-10, 28-29, 48-49, 52-53, 53-54, 55-57, 62-64, 80-81, 155-157, 170-171, 171-172, 200-202.

### Full assignments of NMR data for 1-azabicyclic products 5a-k and determination of stereochemistry by NMR spectroscopy

The structure determination of **5a-k** and assignment of <sup>1</sup>H and <sup>13</sup>C were performed by using various NMR techniques, including <sup>1</sup>H, <sup>13</sup>C, DEPT, H-H COSY, HMQC, ROESY, and nOe difference spectroscopy by double pulse field gradient spin echo (DPFGSE) or CYCLENONE. Only critical nOe relationships are indicated by arrows in the figures shown below. A detailed description for these NMR advanced NMR spectroscopic analyses is provided for the case of (3*R*,4*S*,6*R*,10*S*)-**5g**. All measurements were carried out in CDCl<sub>3</sub> at 25°C unless otherwise noted.

#### (3*S*,6*S*,10*S*)-1-Aza-3-*tert*-butoxycarbonylamino-10-methoxycarbonyl-5-oxa-2-oxobicyclo[4.4.0]-decane, (3*S*,6*S*,10*S*)-**5a**:

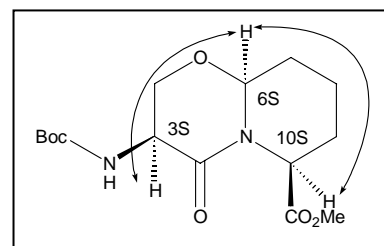

Table 1. <sup>1</sup>H and <sup>13</sup>C NMR data for (3*S*,6*S*,10*S*)-**5a**

| No | <sup>13</sup> C δ, ppm | <sup>1</sup> H-NMR, ppm, α | <sup>1</sup> H-NMR, ppm, β |
|----|------------------------|----------------------------|----------------------------|
| 2  | 168.4                  | ---                        | ---                        |
| 3  | 49.8                   | 4.39-4.44, m               | ---                        |
| 4  | 67.0                   | 4.16, dd 10.2; 6.2         | 3.75, dd 10.2; 7.0         |
| 6  | 82.7                   | 4.93, dd 8.4; 4.4          |                            |
| 7  | 28.0                   | 1.84-2.01, m               | 1.65-1.79, m               |
| 8  | 16.5                   | 1.65-1.79, m               | 1.47-1.57, m               |
| 9  | 24.4                   | 1.84-2.01, m               | 1.84-2.01, m               |



|                                  |       |              |     |
|----------------------------------|-------|--------------|-----|
| 10                               | 54.0  | 4.39-4.44, m | --- |
| 11                               | 171.5 | ---          | --- |
| CO <sub>2</sub> CH <sub>3</sub>  | 52.4  | 3.68, s      | --- |
| N-H                              | ---   | 5.36, d 6.0  | --- |
| O(O)CN                           | 155.4 | ---          | --- |
| C(CH <sub>3</sub> ) <sub>3</sub> | 80.0  | ---          | --- |
| C(CH <sub>3</sub> ) <sub>3</sub> | 28.2  | 1.38, s      | --- |

**(3*S*,6*R*,10*R*)-1-Aza-3-*tert*-butoxycarbonylamino-10-methoxycarbonyl-5-oxa-2-oxobicyclo[4.4.0]-decane, (3*S*,6*R*,10*R*)-5a:**

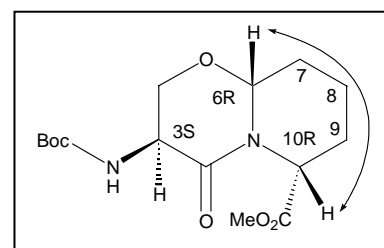

Table 2. <sup>1</sup>H and <sup>13</sup>C NMR data for (3*S*,6*R*,10*S*)-5a

| No                               | <sup>13</sup> C δ, ppm | <sup>1</sup> H-NMR, ppm, α | <sup>1</sup> H-NMR, ppm, β |
|----------------------------------|------------------------|----------------------------|----------------------------|
| 2                                | 166.5                  | ---                        | ---                        |
| 3                                | 50.9                   | 4.25, brs                  | ---                        |
| 4                                | 68.2                   | 3.98-4.02, m               | 3.98-4.02, m               |
| 6                                | 85.1                   | ---                        | 4.90, dd 10.2; 3.4         |
| 7                                | 31.4                   | 1.39-1.49, m               | 1.92-1.99, m               |
| 8                                | 19.1                   | 1.31-1.41, m               | 1.71-1.77, m               |
| 9                                | 26.1                   | 1.57-1.67, m               | 2.16-2.23, m               |
| 10                               | 52.5                   | ---                        | 5.33, d 5.2                |
| 11                               | 171.1                  | ---                        | ---                        |
| CO <sub>2</sub> CH <sub>3</sub>  | 52.2                   | 3.69, s                    | ---                        |
| N-H                              | ---                    | 5.23, d 7.2                | ---                        |
| O(O)CN                           | 155.2                  | ---                        | ---                        |
| C(CH <sub>3</sub> ) <sub>3</sub> | 80.1                   | ---                        | ---                        |
| C(CH <sub>3</sub> ) <sub>3</sub> | 28.3                   | 1.40, s                    | ---                        |

**(3*S*,6*R*,10*S*)-1-Aza-10-benzyloxymethyl-3-*tert*-butoxycarbonylamino-5-oxa-2-oxobicyclo[4.4.0]-decane, (3*S*,6*R*,10*S*)-5b:**

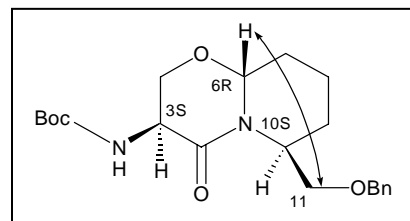

Table 3.  $^1\text{H}$  and  $^{13}\text{C}$  NMR data for (3*S*,6*R*,10*S*)-5b

| Position                                    | $^{13}\text{C}$ , $\delta$ , ppm | $^1\text{H}(\alpha)$ , $\delta$ , ppm, Hz | $^1\text{H}(\beta)$ , $\delta$ , ppm, Hz |
|---------------------------------------------|----------------------------------|-------------------------------------------|------------------------------------------|
| 2                                           | 167.1                            | -----                                     | -----                                    |
| 3                                           | 48.9                             | 4.14, quintet, 6.0                        | -----                                    |
| 4                                           | 67.0                             | 4.37-4.43, m                              | 3.45-3.46, m.                            |
| 6                                           | 85.7                             | -----                                     | 4.80, dd, 10.8; 3.0                      |
| 7                                           | 32.5                             | 1.39-1.45, m                              | 1.93, dt, 12.6, 1.8, 1.8                 |
| 8                                           | 18.3                             | 1.66-1.68, m                              | 1.66-1.68, m                             |
| 9                                           | 25.4                             | 1.54-1.60, m                              | 1.84, d, 13.8                            |
| 10                                          | 50.5                             | 4.86, quartet, 6.0                        | -----                                    |
| 11                                          | 69.2                             | 3.55, t, 7.8 and 3.48-3.51, m             | -----                                    |
| NH                                          | -----                            | 5.24, br s                                | -----                                    |
| OC(O)-N                                     | 156.1                            | -----                                     | -----                                    |
| C(CH <sub>3</sub> ) <sub>3</sub>            | 80.1                             | -----                                     | -----                                    |
| C(CH <sub>3</sub> ) <sub>3</sub>            | 28.5                             | 1.42, s                                   | -----                                    |
| O-CH <sub>2</sub> -Ph                       | 73.2                             | 4.50, s                                   | -----                                    |
| <i>ipso</i> -C <sub>6</sub> H <sub>5</sub>  | 138.4                            | -----                                     | -----                                    |
| <i>ortho</i> -C <sub>6</sub> H <sub>5</sub> | 127.8                            | 7.25-7.34, m                              | -----                                    |
| <i>meta</i> -C <sub>6</sub> H <sub>5</sub>  | 128.6                            | 7.25-7.34, m                              | -----                                    |
| <i>para</i> -C <sub>6</sub> H <sub>5</sub>  | 127.9                            | 7.25-7.34, m                              | -----                                    |

**(3*R*,6*R*,10*S*)-1-Aza-10-benzyloxymethyl-3-*tert*-butoxycarbonylamino-5-oxa-2-oxobicyclo[4.4.0]-decane, (3*R*,6*R*,10*S*)-5b:**

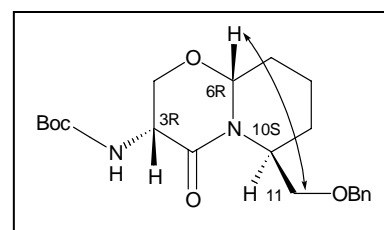

Table 4. <sup>1</sup>H and <sup>13</sup>C NMR data for (3*R*,6*R*,10*S*)-**5b**

| Position                                    | <sup>13</sup> C, δ, ppm | <sup>1</sup> H(α), δ, ppm, Hz | <sup>1</sup> H(β), δ, ppm, Hz |
|---------------------------------------------|-------------------------|-------------------------------|-------------------------------|
| 2                                           | 165.7                   | -----                         | -----                         |
| 3                                           | 48.4                    | -----                         | 4.18, br, s                   |
| 4                                           | 67.5                    | 3.95, d, 12.0                 | 3.86, dd, 12.0, 3.6           |
| 6                                           | 84.7                    | -----                         | 4.79, dd, 10.8; 3.0           |
| 7                                           | 32.1                    | 1.42-1.49, m                  | 1.92, dd, 12.6, 3.0           |
| 8                                           | 18.5                    | 1.66-1.72, m                  | 1.66-1.72, m                  |
| 9                                           | 25.5                    | 1.54-1.60, m                  | 1.80, d, 13.8                 |
| 10                                          | 51.2                    | 4.98, quartet, 6.0            | -----                         |
| 11                                          | 69.6                    | 3.55, t, 7.8 and 3.48-3.51, m | -----                         |
| NH                                          | -----                   | 5.27, br s                    | -----                         |
| OC(O)-N                                     | 155.7                   | -----                         | -----                         |
| C(CH <sub>3</sub> ) <sub>3</sub>            | 80.2                    | -----                         | -----                         |
| C(CH <sub>3</sub> ) <sub>3</sub>            | 28.5                    | 1.42, s                       | -----                         |
| O-CH <sub>2</sub> -Ph                       | 73.2                    | 4.48, and 4.46, d, 12.0       | -----                         |
| <i>ipso</i> -C <sub>6</sub> H <sub>5</sub>  | 138.2                   | -----                         | -----                         |
| <i>ortho</i> -C <sub>6</sub> H <sub>5</sub> | 127.8                   | 7.25-7.33, m                  | -----                         |
| <i>meta</i> -C <sub>6</sub> H <sub>5</sub>  | 128.6                   | 7.25-7.33, m                  | -----                         |
| <i>para</i> -C <sub>6</sub> H <sub>5</sub>  | 127.9                   | 7.25-7.33, m                  | -----                         |

**(3*S*,7*S*,11*S*)-1-Aza-3-*tert*-butoxycarbonylamino-11-methoxycarbonyl-2-oxo-6-oxabicyclo[5.4.0]undecane, (3*S*,7*S*,11*S*)-**5c**:**

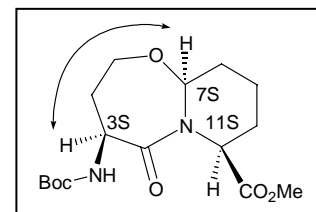Table 5. <sup>1</sup>H and <sup>13</sup>C NMR data for (3*S*,7*S*,11*S*)-**5c**, 25 °C in d<sub>6</sub>-benzene.

| Position | <sup>13</sup> C, δ, ppm | <sup>1</sup> H(α), δ, ppm, Hz | <sup>1</sup> H(β), δ, ppm, Hz |
|----------|-------------------------|-------------------------------|-------------------------------|
| 2        | 175.1                   | -----                         | -----                         |
| 3        | 53.5                    | 4.73, ddd, 2.0; 6.3; 11.5     | -----                         |
| 4        | 33.8                    | 1.80, dd, 14.0; 2.0           | 2.09-2.17, m                  |

|                                                   |       |                            |                                  |
|---------------------------------------------------|-------|----------------------------|----------------------------------|
| 5                                                 | 70.4  | 3.50, ddd, 1.5; 12.0; 12.0 | 3.77, ddd, 3.5; 7.0; 12.0        |
| 7                                                 | 82.9  | 4.36, brs                  | -----                            |
| 8                                                 | 30.9  | 1.45-1.55, m               | 1.06, dddd, 4.5; 4.5; 12.5; 12.5 |
| 9                                                 | 15.9  | 1.35-1.45, m               | 0.95, ddddd, 4.8; 4.8; 4.8; 9.6; |
|                                                   |       |                            | 13.2                             |
| 10                                                | 25.6  | 2.09-2.17, m               | 1.17, dddd, 4.0; 7.0; 13.0; 15.0 |
| 11                                                | 52.8  | 5.15, dd, 7.5; 2.0         | -----                            |
| NH                                                | ----- | 6.20, d, 5.5               | -----                            |
| $\underline{\text{C}}\text{O}_2\text{CH}_3$       | 171.9 | -----                      | -----                            |
| $\text{CO}_2\underline{\text{C}}\text{H}_3$       | 52.1  | 3.27, s                    | -----                            |
| $\text{O}\underline{\text{C}}(\text{O})\text{-N}$ | 155.7 | -----                      | -----                            |
| $\underline{\text{C}}(\text{CH}_3)_3$             | 79.4  | -----                      | -----                            |
| $\text{C}(\underline{\text{C}}\text{H}_3)_3$      | 28.8  | 1.46, s                    | -----                            |

**(3*S*,6*S*,10*S*)-1,5-Diaza-3-*tert*-butoxycarbonylamino-5-*tert*-butoxycarbonyl-10-methoxycarbonyl-2-oxobicyclo[4.4.0]decane, (3*S*,6*S*,10*S*)-5d** (see the X-ray crystal structure for the determination of stereochemistry):

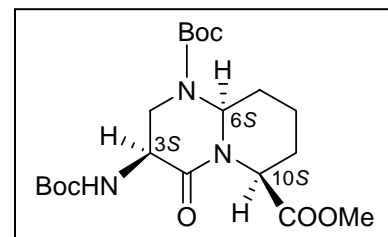

Table 6.  $^1\text{H}$  and  $^{13}\text{C}$  NMR data for (3*S*,6*S*,10*S*)-5d

| No | $^{13}\text{C}$ $\delta$ , ppm | $^1\text{H}$ -NMR, ppm, $\alpha$ | $^1\text{H}$ -NMR, ppm, $\beta$ |
|----|--------------------------------|----------------------------------|---------------------------------|
| 2  | 167.8                          | ---                              | ---                             |
| 3  | 50.3                           | 4.01, ddd, 10.8, 4.8, 4.8        | ---                             |
| 4  | 68.5                           | 3.03, t, 12.0                    | 3.74, m                         |
| 6  | 81.8                           | 5.30, brs                        |                                 |
| 7  | 41.7                           | 1.65-2.02, m                     | 1.65-2.02, m                    |
| 8  | 21.5                           | 1.65-2.02, m                     | 1.65-2.02, m                    |
| 9  | 29.6                           | 1.65-2.02, m                     | 1.65-2.02, m                    |
| 10 | 59.8                           | 4.06, brs                        | ---                             |
| 11 | 169.5                          | ---                              | ---                             |

|                                           |              |            |     |
|-------------------------------------------|--------------|------------|-----|
| CO <sub>2</sub> <u>C</u> H <sub>3</sub>   | 52.2         | 3.71, s    | --- |
| N-H                                       | ---          | 5.47, brs  | --- |
| O(O) <u>C</u> N                           | 155.4, 153.2 | ---        | --- |
| <u>C</u> (CH <sub>3</sub> ) <sub>3</sub>  | 79.8 (2C)    | ---        | --- |
| C( <u>C</u> H <sub>3</sub> ) <sub>3</sub> | 28.3, 24.5   | 1.41, 1.49 | --- |

**(3R,6S,10S)-1-Aza-3-benzoyloxycarbonylamino-10-methoxycarbonyl-2-oxo-6-thiabicyclo[4.4.0]-decane, (3R,6S,10S)-5e:**

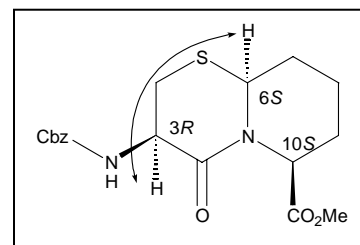

Table 7. <sup>1</sup>H and <sup>13</sup>C NMR data for (3R,6S,10S)-5e

| Position                                     | <sup>13</sup> C, δ, ppm | <sup>1</sup> H(α), δ, ppm, Hz | <sup>1</sup> H(β), δ, ppm, Hz |
|----------------------------------------------|-------------------------|-------------------------------|-------------------------------|
| 2                                            | 170.9                   | -----                         | -----                         |
| 3                                            | 51.5                    | 4.69, ddd, 12.0, 6.0, 6.0     | -----                         |
| 4                                            | 29.0                    | 2.69, dd, 12.0, 10.5          | 3.55, dd, 10.5, 6.0           |
| 6                                            | 53.1                    | 5.04-5.14, m                  | -----                         |
| 7                                            | 27.8                    | 1.94-2.04, m                  | 1.70-1.80, m                  |
| 8                                            | 17.2                    | 1.62-1.82, m                  | 1.50-1.60, m                  |
| 9                                            | 24.6                    | 2.16-2.26, m                  | 1.84-1.90, m                  |
| 10                                           | 53.5                    | 4.88, dd, 7.2, 3.6            | -----                         |
| NH                                           | -----                   | 6.13, d, 6.0                  | -----                         |
| <u>C</u> O <sub>2</sub> CH <sub>3</sub>      | 171.5                   | -----                         | -----                         |
| CO <sub>2</sub> <u>C</u> H <sub>3</sub>      | 52.4                    | 3.70, s                       | -----                         |
| O <u>C</u> (O)-N                             | 155.5                   | -----                         | -----                         |
| Ph- <u>C</u> H <sub>2</sub>                  | 66.9                    | 5.09, s, 2H                   | -----                         |
| C <sub>6</sub> H <sub>5</sub> , <i>ortho</i> | 127.9                   | 7.25-7.35, m                  | -----                         |
| C <sub>6</sub> H <sub>5</sub> , <i>meta</i>  | 128.4                   | 7.25-7.35, m                  | -----                         |
| C <sub>6</sub> H <sub>5</sub> , <i>para</i>  | 128.0                   | 7.25-7.35, m                  | -----                         |
| C <sub>6</sub> H <sub>5</sub> , <i>ipso</i>  | 136.2                   | -----                         | -----                         |

**(3*S*,7*S*,11*S*)-1-Aza-3-benzyloxycarbonylamino-11-methoxycarbonyl-2-oxo-6-thiabicyclo[5.4.0]-undecane, (3*S*,7*S*,11*S*)-5f:**

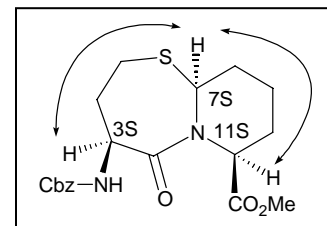

Table 8.  $^1\text{H}$  and  $^{13}\text{C}$  NMR data for (3*S*,7*S*,11*S*)-5f,  $\text{CDCl}_3$ , 50 °C for  $^1\text{H}$ -NMR.

| Position                                          | $^{13}\text{C}$ , $\delta$ , ppm | $^1\text{H}(\alpha)$ , $\delta$ , ppm, Hz | $^1\text{H}(\beta)$ , $\delta$ , ppm, Hz |
|---------------------------------------------------|----------------------------------|-------------------------------------------|------------------------------------------|
| 2                                                 | 168.2                            | -----                                     | -----                                    |
| 3                                                 | 58.1                             | 5.02, d, 6.5                              | -----                                    |
| 4                                                 | 36.8                             | 2.05-2.25, m                              | 2.05-2.25, m                             |
| 5                                                 | 20.3                             | 2.61-2.70 <sup>a</sup> , m                | 2.50-2.58 <sup>a</sup> , m               |
| 7                                                 | 69.8                             | 5.10-5.20, m                              | -----                                    |
| 8                                                 | 32.8                             | 2.38-2.46 <sup>b</sup> , m                | 1.14-1.22 <sup>b</sup> , m               |
| 9                                                 | 19.4                             | 1.76-1.84, m                              | 1.50-1.60, m                             |
| 10                                                | 26.5                             | 1.55-1.65, m                              | 2.05-2.25, m                             |
| 11                                                | 51.4                             | 4.37, dd, 5.0; 5.0                        | -----                                    |
| NH                                                | -----                            | 5.15-5.25, m                              | -----                                    |
| $\underline{\text{C}}\text{O}_2\text{CH}_3$       | 170.6                            | -----                                     | -----                                    |
| $\text{CO}_2\underline{\text{C}}\text{H}_3$       | 52.9                             | 3.77, s                                   | -----                                    |
| $\text{O}\underline{\text{C}}(\text{O})\text{-N}$ | 154.7                            | -----                                     | -----                                    |
| $\text{Ph-}\underline{\text{C}}\text{H}_2$        | 67.9                             | 5.23, d 12.5; 5.19 d, 12.5                | -----                                    |
| $\text{C}_6\text{H}_5$ , <i>ortho</i>             | 128.4                            | 7.25-7.35, m                              | -----                                    |
| $\text{C}_6\text{H}_5$ , <i>meta</i>              | 128.7                            | 7.25-7.35, m                              | -----                                    |
| $\text{C}_6\text{H}_5$ , <i>para</i>              | 128.89                           | 7.25-7.35, m                              | -----                                    |
| $\text{C}_6\text{H}_5$ , <i>ipso</i>              | 135.92                           | -----                                     | -----                                    |

a, b: interchangeable

**(3*S*,4*R*,6*S*,10*S*)-1-Aza-3-*tert*-butoxycarbonylamino-10-methoxycarbonyl-4-methyl-5-oxa-2-oxobicyclo[4.4.0]decane, (3*S*,4*R*,6*S*,10*S*)-5g:**

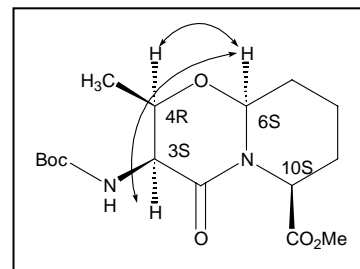

Table 9.  $^1\text{H}$  and  $^{13}\text{C}$  NMR data for (3*S*,4*R*,6*S*,10*S*)-5g

| No                               | $^{13}\text{C}$ $\delta$ , ppm | $^1\text{H}$ -NMR, ppm, $\alpha$ | $^1\text{H}$ -NMR, ppm, $\beta$ |
|----------------------------------|--------------------------------|----------------------------------|---------------------------------|
| 2                                | 168.1                          | ---                              | ---                             |
| 3                                | 53.4                           | 4.45, dd 8.0, 5.0                | ---                             |
| 4                                | 72.6                           | 4.27, dq 6.0, 5.0                | ---                             |
| 6                                | 82.7                           | 4.92, dd 10; 4.5                 | ---                             |
| 7                                | 28.4                           | 1.95-2.00, m                     | 1.66-1.72, m                    |
| 8                                | 17.0                           | 1.74-1.81, m                     | 1.52-1.58, m                    |
| 9                                | 24.7                           | 1.95-2.00, m                     | 1.97-2.03, m                    |
| 10                               | 53.8                           | 4.41, t, 7.0                     | ---                             |
| 11                               | 171.7                          | ---                              | ---                             |
| CO <sub>2</sub> CH <sub>3</sub>  | 52.4                           | 3.72, s                          | ---                             |
| 4-CH <sub>3</sub>                | 16.5                           | ---                              | 1.21, d 6.0                     |
| N-H                              | ---                            | 5.25, d 8.0                      | ---                             |
| O(O)C-N                          | 155.6                          | ---                              | ---                             |
| C(CH <sub>3</sub> ) <sub>3</sub> | 80.0                           | ---                              | ---                             |
| C(CH <sub>3</sub> ) <sub>3</sub> | 28.3                           | 1.44, s                          | ---                             |

**(3*S*,4*S*,6*S*,10*S*)-1-Aza-3-*tert*-butoxycarbonylamino-10-methoxycarbonyl-4-methyl-5-oxa-2-oxobicyclo[4.4.0]decane, (3*S*,4*S*,6*S*,10*S*)-5g:**

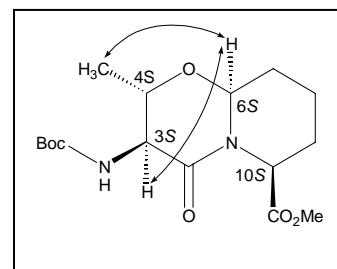

Table 10.  $^1\text{H}$  and  $^{13}\text{C}$  NMR data for (3*S*,4*S*,6*S*,10*S*)-**5g**

| No                                                | $^{13}\text{C}$ $\delta$ , ppm | $^1\text{H}$ -NMR, ppm, $\alpha$ | $^1\text{H}$ -NMR, ppm, $\beta$ |
|---------------------------------------------------|--------------------------------|----------------------------------|---------------------------------|
| 2                                                 | 170.2                          | ---                              | ---                             |
| 3                                                 | 55.1                           | 4.31, t, 8.5                     | ---                             |
| 4                                                 | 72.5                           | ---                              | 3.78,qd, 6.0,10.0               |
| 6                                                 | 79.1                           | 5.12, dd, 5.5, 7.0               | ---                             |
| 7                                                 | 28.3                           | 1.85-1.94, m                     | 1.67-1.78, m                    |
| 8                                                 | 16.7                           | 1.46-1.53, m                     | 1.67-1.78, m                    |
| 9                                                 | 24.7                           | 1.85-1.94, m                     | 1.99-2.06, m                    |
| 10                                                | 52.5                           | 4.48, t, 6.0                     | ---                             |
| 11                                                | 171.8                          | ---                              | ---                             |
| $\text{CO}_2\text{C}\underline{\text{H}}_3$       | 52.5                           | 3.70, s                          | ---                             |
| 4- $\text{C}\underline{\text{H}}_3$               | 19.2                           | 1.34, d, 5.5                     | ---                             |
| N-H                                               | ---                            | 5.15, d 6.5                      | ---                             |
| $\text{O}(\text{O})\underline{\text{C}}-\text{N}$ | 156.2                          | ---                              | ---                             |
| $\underline{\text{C}}(\text{CH}_3)_3$             | 80.1                           | ---                              | ---                             |
| $\text{C}(\underline{\text{C}}\text{H}_3)_3$      | 28.3                           | 1.41, s                          | ---                             |

**(3*S*,4*S*,6*R*,10*S*)-1-Aza-3-*tert*-butoxycarbonylamino-10-methoxycarbonyl-4-methyl-5-oxa-2-oxobicyclo[4.4.0]decane, (3*S*,4*S*,6*R*,10*S*)-**5g**:**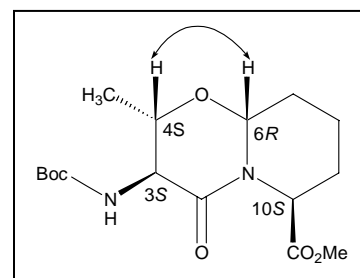Table 11.  $^1\text{H}$  and  $^{13}\text{C}$  NMR data for (3*S*,4*S*,6*R*,10*S*)-**5g**

| No | $^{13}\text{C}$ $\delta$ , ppm | $^1\text{H}$ -NMR, ppm, $\alpha$ | $^1\text{H}$ -NMR, ppm, $\beta$ |
|----|--------------------------------|----------------------------------|---------------------------------|
| 2  | 169.1                          | ---                              | ---                             |
| 3  | 56.1                           | 4.04-4.11, m                     | ---                             |
| 4  | 74.7                           | ---                              | 3.77,dddd, 6.0,6.0,6.0,10.0     |
| 6  | 85.4                           | ---                              | 4.98, dd, 3.0, 11.0             |



|                                  |       |                        |                              |
|----------------------------------|-------|------------------------|------------------------------|
| 7                                | 31.8  | 1.39-1.47, m           | 1.94,dddd, 13.0,10.0,3.5,1.5 |
| 8                                | 19.5  | 1.75,qnt/d, 3.0, 13.0  | 1.30-1.36, m                 |
| 9                                | 26.3  | 2.19,qnt/d, 1.5, 14.0, | 1.65,dddd, 13.5,13.5,6.5,4.0 |
| 10                               | 53.1  | 5.18, d, 6.0           | ---                          |
| 11                               | 171.6 | ---                    | ---                          |
| CO <sub>2</sub> CH <sub>3</sub>  | 52.6  | 3.70, s                | ---                          |
| 4-CH <sub>3</sub>                | 19.1  | 1.33, d, 6.0           | ---                          |
| N-H                              | ---   | 4.87, brs              | ---                          |
| O(O)C-N                          | 156.6 | ---                    | ---                          |
| C(CH <sub>3</sub> ) <sub>3</sub> | 80.1  | ---                    | ---                          |
| C(CH <sub>3</sub> ) <sub>3</sub> | 28.5  | 1.42, s                | ---                          |

**(3*R*,4*R*,6*R*,10*S*)-1-Aza-3-*tert*-butoxycarbonylamino-10-methoxycarbonyl-4-methyl-5-oxa-2-oxo-bicyclo[4.4.0]decane, (3*R*,4*R*,6*R*,10*S*)-5g:**

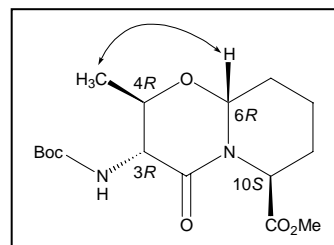

Table 12. <sup>1</sup>H and <sup>13</sup>C NMR data for (3*R*,4*R*,6*R*,10*S*)-5g

| No                              | <sup>13</sup> C δ, ppm | <sup>1</sup> H-NMR, ppm, α | <sup>1</sup> H-NMR, ppm, β   |
|---------------------------------|------------------------|----------------------------|------------------------------|
| 2                               | 167.0                  | ---                        | ---                          |
| 3                               | 55.6                   | ---                        | 4.01-4.08, m                 |
| 4                               | 71.4                   | 4.12, quintet, 6.0         | ---                          |
| 6                               | 80.7                   | ---                        | 5.08, dd, 3.0, 10.5          |
| 7                               | 31.3                   | 1.59, qd, 13.0; 3.0        | 1.90-1.94, m                 |
| 8                               | 19.7                   | 1.82-1.86, m               | 1.43-1.50, m                 |
| 9                               | 26.2                   | 2.23-2.26, m               | 1.66,dddd, 14.0,14.0,6.0,4.0 |
| 10                              | 52.6                   | 5.43, d, 6.0               | ---                          |
| 11                              | 171.3                  | ---                        | ---                          |
| CO <sub>2</sub> CH <sub>3</sub> | 52.6                   | 3.75, s                    | ---                          |
| 4-CH <sub>3</sub>               | 17.1                   | ---                        | 1.43, d, 7.0                 |

|                                          |       |              |     |
|------------------------------------------|-------|--------------|-----|
| N-H                                      | ----- | 5.17, d, 7.0 | --- |
| O(O) <u>C</u> -N                         | 155.8 | -----        | --- |
| <u>C</u> (CH <sub>3</sub> ) <sub>3</sub> | 80.1  | -----        | --- |
| C( <u>CH</u> <sub>3</sub> ) <sub>3</sub> | 28.4  | 1.46, s      | --- |

**(3R,4S,6S,10S)-1-Aza-3-*tert*-butoxycarbonylamino-10-methoxycarbonyl-4-methyl-5-oxa-2-oxobicyclo[4.4.0]decane, (3R,4S,6S,10S)-5g:**

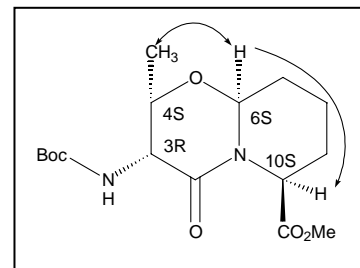

Table 13. <sup>1</sup>H and <sup>13</sup>C NMR data for (3R,4S,6S,10S)-5g

| No                                       | <sup>13</sup> C δ, ppm | <sup>1</sup> H-NMR, ppm, α | <sup>1</sup> H-NMR, ppm, β |
|------------------------------------------|------------------------|----------------------------|----------------------------|
| 2                                        | 169.3                  | ---                        | ---                        |
| 3                                        | 54.2                   | ---                        | 4.46, brs                  |
| 4                                        | 70.5                   | ---                        | 4.71-4.78, m               |
| 6                                        | 81.3                   | 4.72, dd, 3.0, 11.0        | ---                        |
| 7                                        | 30.5                   | 1.83-1.91, m               | 1.67-1.77, m               |
| 8                                        | 20.0                   | 1.46-1.55, m               | 1.83-1.91, m               |
| 9                                        | 27.5                   | 1.67-1.77, m               | 1.90-1.97, m               |
| 10                                       | 56.7                   | 5.34, dd, 11.0, 4.0        | ---                        |
| 11                                       | 171.5                  | ---                        | ---                        |
| CO <sub>2</sub> <u>CH</u> <sub>3</sub>   | 52.5                   | 3.72, s                    | ---                        |
| 4-CH <sub>3</sub>                        | 12.9                   | 1.18, d 7.0                | ---                        |
| N-H                                      | ---                    | 5.45, brs                  | ---                        |
| O(O) <u>C</u> -N                         | 155.8                  | ---                        | ---                        |
| <u>C</u> (CH <sub>3</sub> ) <sub>3</sub> | 80.1                   | ---                        | ---                        |
| C( <u>CH</u> <sub>3</sub> ) <sub>3</sub> | 28.5                   | 1.40, s                    | ---                        |

**(3R,4S,6R,10S)-1-Aza-3-tert-butoxycarbonylamino-10-methoxycarbonyl-4-methyl-5-oxa-2-oxobicyclo[4.4.0]decane, (3R,4S,6R,10S)-5g:**

The full structure determination of (3R,4S,6R,10S)-**5g** was carried out using advanced NMR techniques. HMQC experiment afforded the direct proton-carbon connectivity, which helped to distinguish H-6 and H-10 because the chemical shift of C-6 should be more downfield than that of C-10. H-H-COSY clearly indicated two independent coupling systems, which were used to identify H-3, H-4, H-6 H-10, NH. It should be noted that the chemical shift of H-10 ( $\delta$  5.34) was quite large (in downfield) beyond the normal range. It should be attributed to the magnetic anisotropy effect from the 2-oxo group. Double pulse field gradient spin echo transient NOE experiment, a kind of NOE difference technique, provided the sensitive information about the spatial arrangement. Irradiation of the  $\delta$  4.95 peak resulted in the enhancement of H-4 and two protons, which were assigned to H-7 $\beta$  and H-8 $\beta$ , whereas irradiation of H-4 enhanced only H-6. Irradiation of the  $\delta$  5.34 peak only gave a weak enhancement on H-9 $\alpha$ . These results have provided the strong supporting evidence that the angular proton, H-6, is *cis* to the 10-methoxycarbonyl group.

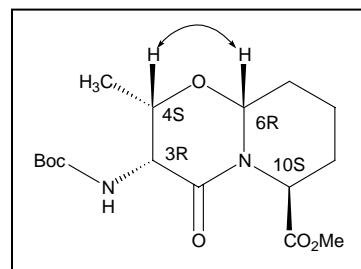

Irradiation of the  $\delta$  4.95 peak resulted in the enhancement of H-4 and two protons, which were assigned to H-7 $\beta$  and H-8 $\beta$ , whereas irradiation of H-4 enhanced only H-6. Irradiation of the  $\delta$  5.34 peak only gave a weak enhancement on H-9 $\alpha$ . These results have provided the strong supporting evidence that the angular proton, H-6, is *cis* to the 10-methoxycarbonyl group.

Table 14.  $^1\text{H}$  and  $^{13}\text{C}$  NMR data for (3R,4S,6R,10S)-**5g**

| No                             | $^{13}\text{C}$ $\delta$ , ppm | $^1\text{H}$ -NMR, ppm, $\alpha$ | $^1\text{H}$ -NMR, ppm, $\beta$ |
|--------------------------------|--------------------------------|----------------------------------|---------------------------------|
| 2                              | 167.2                          | ---                              | ---                             |
| 3                              | 54.3                           | ---                              | 4.21, d, 10.0                   |
| 4                              | 73.6                           | ---                              | 3.96-4.02, m                    |
| 6                              | 85.1                           | ---                              | 4.87, d, 6.0                    |
| 7                              | 31.8                           | 1.27-1.33, m                     | 1.88-1.94, m                    |
| 8                              | 19.4                           | 1.32-1.40, m                     | 1.66-1.72, m                    |
| 9                              | 26.3                           | 1.54-1.60, m                     | 2.14-2.18, m                    |
| 10                             | 52.1                           | 5.24, d, 5.0                     | ---                             |
| 11                             | 171.3                          | ---                              | ---                             |
| $\text{CO}_2\text{CH}_3$       | 52.6                           | 3.64, s                          | ---                             |
| 4- $\text{CH}_3$               | 15.8                           | 1.15, d, 6.0                     | ---                             |
| N-H                            | -----                          | 4.97, d, 10.0                    | ---                             |
| $\text{O}(\text{O})\text{C-N}$ | 155.8                          | ---                              | ---                             |
| $\text{C}(\text{CH}_3)_3$      | 80.1                           | ---                              | ---                             |

|                                                   |      |         |     |
|---------------------------------------------------|------|---------|-----|
| $\underline{\text{C}}(\underline{\text{CH}}_3)_3$ | 28.4 | 1.36, s | --- |
|---------------------------------------------------|------|---------|-----|

**(3*S*,6*S*,9*R*)-1-Aza-3-*tert*-butoxycarbonylamino-9-methoxycarbonyl-5-oxa-2-oxobicyclo[4.3.0]-nonane, (3*S*,6*S*,9*R*)-5h** (see X-ray crystal structure as well):

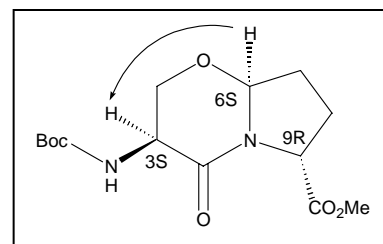

Table 15.  $^1\text{H}$  and  $^{13}\text{C}$  NMR data for (3*S*,6*S*,9*R*)-5h

| Position                                     | $^{13}\text{C}$ , $\delta$ , ppm | $^1\text{H}(\alpha)$ , $\delta$ , ppm, Hz | $^1\text{H}(\beta)$ , $\delta$ , ppm, Hz |
|----------------------------------------------|----------------------------------|-------------------------------------------|------------------------------------------|
| 2                                            | 166.8                            | ---                                       | ---                                      |
| 3                                            | 49.3                             | 4.41-4.46, m                              | ---                                      |
| 4                                            | 68.9                             | 4.36, t, 10.0                             | 3.64, dd, 10.0, 7.0                      |
| 6                                            | 87.6                             | 5.21, dd, 4.5, 5.5                        | ---                                      |
| 7                                            | 31.7                             | 2.23-2.33, m, <sup>a</sup>                | 1.88-1.98, m <sup>a</sup>                |
| 8                                            | 26.3                             | 2.23-2.33, m <sup>b</sup>                 | 1.88-1.98, m <sup>b</sup>                |
| 9                                            | 58.2                             | ---                                       | 4.72, dd, 5.0, 8.0                       |
| 10                                           | 171.6                            | ---                                       | ---                                      |
| $\text{CO}_2\underline{\text{C}}\text{H}_3$  | 52.8                             | 3.70, s                                   | ---                                      |
| NH                                           | -----                            | 5.49, brs                                 | ---                                      |
| $\text{OC}(\text{O})-\text{N}$               | 155.9                            | ---                                       | ---                                      |
| $\underline{\text{C}}(\text{CH}_3)_3$        | 80.4                             | ---                                       | ---                                      |
| $\text{C}(\underline{\text{C}}\text{H}_3)_3$ | 28.5                             | 1.41, s                                   | ---                                      |

a,b: interchangeable

**(3*S*,6*S*,9*S*)-1-Aza-3-*tert*-butoxycarbonylamino-9-methoxycarbonyl-5-oxa-2-oxobicyclo[4.3.0]-nonane, (3*S*,6*S*,9*S*)-5h:**

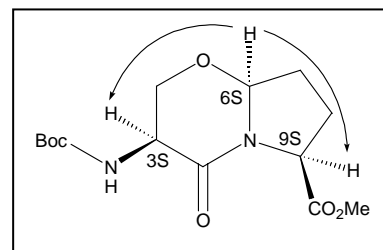

Table 16.  $^1\text{H}$  and  $^{13}\text{C}$  NMR data for (3*S*,6*S*,9*S*)-**5h**

| Position                       | $^{13}\text{C}$ , $\delta$ , ppm | $^1\text{H}(\alpha)$ , $\delta$ , ppm, Hz | $^1\text{H}(\beta)$ , $\delta$ , ppm, Hz |
|--------------------------------|----------------------------------|-------------------------------------------|------------------------------------------|
| 2                              | 166.8                            | ---                                       | ---                                      |
| 3                              | 49.4                             | 4.32-4.37, m                              | ---                                      |
| 4                              | 69.3                             | 4.29, dd, 9.0, 8.0                        | 3.81, dd, 9.0, 6.5                       |
| 6                              | 88.0                             | 5.17, dd, 6.0, 7.0                        | ---                                      |
| 7                              | 30.9                             | 2.23-2.28, m                              | 1.93-2.01, m                             |
| 8                              | 26.46                            | 2.06-2.17, m                              | 2.04-2.12, m                             |
| 9                              | 57.9                             | 4.40, dd, 8.0,1.0                         | ---                                      |
| 10                             | 171.3                            | ---                                       | ---                                      |
| $\text{CO}_2\text{CH}_3$       | 52.7                             | 3.70, s                                   | ---                                      |
| NH                             | -----                            | 5.49, brs                                 | ---                                      |
| $\text{OC}(\text{O})\text{-N}$ | 156.0                            | ---                                       | ---                                      |
| $\text{C}(\text{CH}_3)_3$      | 80.3                             | ---                                       | ---                                      |
| $\text{C}(\text{CH}_3)_3$      | 28.4                             | 1.39, s                                   | ---                                      |

**(3*R*,6*R*,9*S*)-1-Aza-3-*tert*-butoxycarbonylamino-9-methoxycarbonyl-5-oxa-2-oxobicyclo[4.3.0]-nonane, (3*R*,6*R*,9*S*)-**5h**** (see X-ray crystal structure as well):

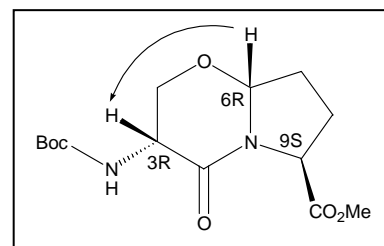Table 17.  $^1\text{H}$  and  $^{13}\text{C}$  NMR data for (3*R*,6*R*,9*S*)-**5h**

| Position | $^{13}\text{C}$ , $\delta$ , ppm | $^1\text{H}(\alpha)$ , $\delta$ , ppm, Hz | $^1\text{H}(\beta)$ , $\delta$ , ppm, Hz |
|----------|----------------------------------|-------------------------------------------|------------------------------------------|
| 2        | 166.8                            | ---                                       | ---                                      |
| 3        | 49.3                             | ---                                       | 4.41-4.46, m                             |
| 4        | 68.9                             | 4.36, t, 10                               | 3.64, dd, 10.0, 7.0                      |
| 6        | 87.6                             | ---                                       | 5.21, dd, 4.5, 5.5                       |
| 7        | 31.7                             | 2.23-2.33, m, <sup>a</sup>                | 1.88-1.98, m <sup>a</sup>                |
| 8        | 26.3                             | 2.23-2.33, m, <sup>b</sup>                | 1.88-1.98, m <sup>b</sup>                |
| 9        | 58.2                             | 4.72, dd, 5.0, 8.0                        | ---                                      |
| 10       | 171.6                            | ---                                       | ---                                      |

|                                           |       |           |     |
|-------------------------------------------|-------|-----------|-----|
| CO <sub>2</sub> <u>C</u> H <sub>3</sub>   | 52.8  | 3.70, s   | --- |
| NH                                        | ----- | 5.49, brs | --- |
| OC(O)-N                                   | 155.9 | ---       | --- |
| <u>C</u> (CH <sub>3</sub> ) <sub>3</sub>  | 80.4  | ---       | --- |
| C( <u>C</u> H <sub>3</sub> ) <sub>3</sub> | 28.5  | 1.41, s   | --- |

a,b: interchangeable

**(3*R*,6*R*,9*R*)-1-Aza-3-*tert*-butoxycarbonylamino-9-methoxycarbonyl-5-oxa-2-oxobicyclo[4.3.0]-nonane, (3*R*,6*R*,9*R*)-5h:**

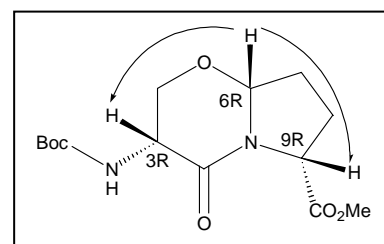

Table 18. <sup>1</sup>H and <sup>13</sup>C NMR data for (3*R*,6*R*,9*R*)-5h

| Position                                  | <sup>13</sup> C, δ, ppm | <sup>1</sup> H(α), δ, ppm, Hz | <sup>1</sup> H(β), δ, ppm, Hz |
|-------------------------------------------|-------------------------|-------------------------------|-------------------------------|
| 2                                         | 166.8                   | ---                           | ---                           |
| 3                                         | 49.4                    | ---                           | 4.32-4.37, m                  |
| 4                                         | 69.3                    | 4.29, dd, 9.0, 8.0            | 3.81, dd, 9.0, 6.5            |
| 6                                         | 88.0                    | ---                           | 5.17, dd, 6.0, 7.0            |
| 7                                         | 30.9                    | 1.93-2.01, m                  | 2.23-2.28, m                  |
| 8                                         | 26.5                    | 2.04-2.12, m                  | 2.06-2.17, m                  |
| 9                                         | 57.9                    | ---                           | 4.40, dd, 8.0, 1.0            |
| 10                                        | 171.3                   | ---                           | ---                           |
| CO <sub>2</sub> <u>C</u> H <sub>3</sub>   | 52.7                    | 3.70, s                       | ---                           |
| NH                                        | -----                   | 5.49, brs                     | ---                           |
| OC(O)-N                                   | 156.0                   | ---                           | ---                           |
| <u>C</u> (CH <sub>3</sub> ) <sub>3</sub>  | 80.3                    | ---                           | ---                           |
| C( <u>C</u> H <sub>3</sub> ) <sub>3</sub> | 28.4                    | 1.39, s                       | ---                           |

**(3*S*,6*S*,9*R*)-1-Aza-9-benzyloxymethyl-3-*tert*-butoxycarbonylamino-5-oxa-2-oxobicyclo[4.3.0]nonane, (3*S*,6*S*,9*R*)-5i:**

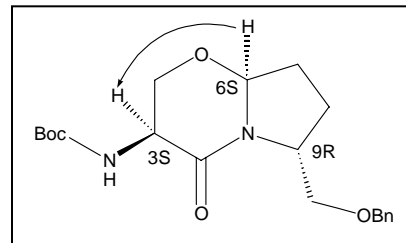

Table 19.  $^1\text{H}$  and  $^{13}\text{C}$  NMR data for (3*S*,6*S*,9*R*)-5i

| Position                                    | $^{13}\text{C}$ , $\delta$ , ppm | $^1\text{H}(\alpha)$ , $\delta$ , ppm, Hz | $^1\text{H}(\beta)$ , $\delta$ , ppm, Hz |
|---------------------------------------------|----------------------------------|-------------------------------------------|------------------------------------------|
| 2                                           | 166.8                            | -----                                     | -----                                    |
| 3                                           | 49.5                             | 4.31-4.38, m                              | -----                                    |
| 4                                           | 68.7                             | 4.30, t, 8.0                              | 3.61, dd, 9.5; 6.0                       |
| 6                                           | 87.9                             | 5.06, dd, 3.5; 6.0                        | -----                                    |
| 7                                           | 31.8                             | 2.27-2.34, m                              | 1.79-1.85, m                             |
| 8                                           | 24.6                             | 1.83-1.91, m                              | 2.02-2.10, m                             |
| 9                                           | 57.3                             | -----                                     | 4.38-4.43, m                             |
| 10                                          | 71.0                             | 3.56, dd, 9.5; 5.0 and 3.52, dd, 9.5; 3.0 |                                          |
| NH                                          | -----                            | 5.45, brs                                 | -----                                    |
| OC(O)-N                                     | 156.1                            | -----                                     | -----                                    |
| C(CH <sub>3</sub> ) <sub>3</sub>            | 80.4                             | -----                                     | -----                                    |
| C(CH <sub>3</sub> ) <sub>3</sub>            | 28.5                             | 1.43, s                                   | -----                                    |
| O-CH <sub>2</sub> -Ph                       | 73.5                             | 4.49, d, 12.0; 4.46, d, 12.0              | -----                                    |
| <i>Ips</i> o-C <sub>6</sub> H <sub>5</sub>  | 138.4                            | -----                                     | -----                                    |
| <i>ortho</i> -C <sub>6</sub> H <sub>5</sub> | 127.8                            | 7.24-7.29, m                              | -----                                    |
| <i>meta</i> -C <sub>6</sub> H <sub>5</sub>  | 128.6                            | 7.30-7.34, m                              | -----                                    |
| <i>Para</i> -C <sub>6</sub> H <sub>5</sub>  | 127.9                            | 7.24-7.29, m                              | -----                                    |

**(3*R*,6*R*,9*R*)-1-Aza-9-benzyloxymethyl-3-*tert*-butoxycarbonylamino-5-oxa-2-oxobicyclo[4.3.0]nonane, (3*R*,6*R*,9*R*)-5i:**

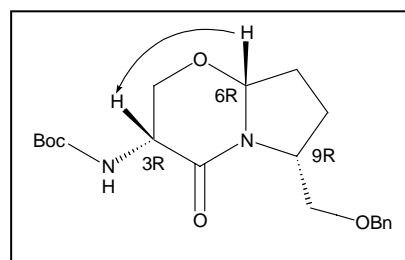

Table 20.  $^1\text{H}$  and  $^{13}\text{C}$  NMR data for (3*R*,6*R*,9*R*)-**5i**

| Position                                    | $^{13}\text{C}$ , $\delta$ , ppm | $^1\text{H}(\alpha)$ , $\delta$ , ppm, Hz | $^1\text{H}(\beta)$ , $\delta$ , ppm, Hz |
|---------------------------------------------|----------------------------------|-------------------------------------------|------------------------------------------|
| 2                                           | 166.6                            | ---                                       | ---                                      |
| 3                                           | 49.4                             | ---                                       | 4.36-4.44, m                             |
| 4                                           | 68.4                             | 3.58, t, 8.5                              | 4.36-4.44, m                             |
| 6                                           | 87.2                             | ---                                       | 5.16, t; 6.5                             |
| 7                                           | 30.6                             | 1.98-2.07, m                              | 2.21, quintet, 6.0                       |
| 8                                           | 25.5                             | 2.13, dd, 12.0, 1.5                       | 1.94, dddd, 12.0,12.0,7.0,7.0            |
| 9                                           | 56.7                             | -----                                     | 4.38-4.43, m                             |
| 10                                          | 68.6                             | 3.56, dd, 9.5; 5.0 and 3.52, dd, 9.5; 3.0 |                                          |
| NH                                          | -----                            | 5.45, brs                                 | -----                                    |
| OC(O)-N                                     | 156.0                            | -----                                     | -----                                    |
| C(CH <sub>3</sub> ) <sub>3</sub>            | 80.3                             | -----                                     | -----                                    |
| C(CH <sub>3</sub> ) <sub>3</sub>            | 28.5                             | 1.43, s                                   | -----                                    |
| O-CH <sub>2</sub> -Ph                       | 73.5                             | 4.49, d, 12.0; 4.46, d, 12.0              | -----                                    |
| <i>ipso</i> -C <sub>6</sub> H <sub>5</sub>  | 138.4                            | -----                                     | -----                                    |
| <i>ortho</i> -C <sub>6</sub> H <sub>5</sub> | 127.7                            | 7.24-7.36, m                              | -----                                    |
| <i>meta</i> -C <sub>6</sub> H <sub>5</sub>  | 128.6                            | 7.24-7.36, m                              | -----                                    |
| <i>para</i> -C <sub>6</sub> H <sub>5</sub>  | 127.8                            | 7.24-7.36, m                              | -----                                    |

(3*R*,6*S*,9*R*)-1-Aza-9-benzyloxymethyl-3-*tert*-butoxycarbonylamino-5-oxa-2-oxobicyclo[4.3.0]nonane, (3*R*,6*S*,9*R*)-**5i**: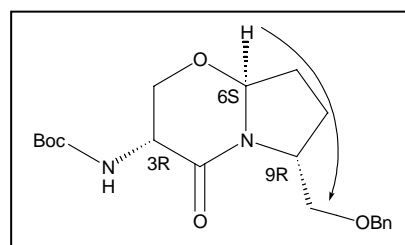Table 21.  $^1\text{H}$  and  $^{13}\text{C}$  NMR data for (3*R*,6*S*,9*R*)-**5i**

| Position | $^{13}\text{C}$ , $\delta$ , ppm | $^1\text{H}(\alpha)$ , $\delta$ , ppm, Hz | $^1\text{H}(\beta)$ , $\delta$ , ppm, Hz |
|----------|----------------------------------|-------------------------------------------|------------------------------------------|
| 2        | 166.7                            | ---                                       | ---                                      |
| 3        | 49.9                             | ---                                       | 4.04, brs                                |
| 4        | 69.2                             | 3.64, t, 10.8                             | 4.43, brs                                |



|                                             |       |                                           |              |
|---------------------------------------------|-------|-------------------------------------------|--------------|
| 6                                           | 90.1  | 5.03, dd; 8.4, 6.5                        | ---          |
| 7                                           | 31.4  | 2.17-2.21, m                              | 1.66-1.73, m |
| 8                                           | 22.7  | 1.84-1.90, m                              | 1.99-2.04, m |
| 9                                           | 56.0  | ---                                       | 4.27, brs    |
| 10                                          | 70.7  | 3.74, dd, 9.6; 4.2 and 3.53, dd, 9.6; 2.4 |              |
| NH                                          | ----- | 5.11, d, 6.0                              | ---          |
| OC(O)-N                                     | 156.1 | ---                                       | ---          |
| C(CH <sub>3</sub> ) <sub>3</sub>            | 80.2  | ---                                       | ---          |
| C(CH <sub>3</sub> ) <sub>3</sub>            | 28.5  | 1.41, s                                   | ---          |
| O-CH <sub>2</sub> -Ph                       | 73.4  | 4.49, d, 12.6; 4.46, d, 12.0              | ---          |
| <i>ipso</i> -C <sub>6</sub> H <sub>5</sub>  | 138.5 | -----                                     | ---          |
| <i>ortho</i> -C <sub>6</sub> H <sub>5</sub> | 127.8 | 7.24-7.36, m                              | ---          |
| <i>meta</i> -C <sub>6</sub> H <sub>5</sub>  | 128.6 | 7.24-7.36, m                              | ---          |
| <i>para</i> -C <sub>6</sub> H <sub>5</sub>  | 127.7 | 7.24-7.36, m                              | ---          |

**(3*S*,6*S*,9*S*)-1-Aza-3-*tert*-butoxycarbonylamino-9-methyl-5-oxa-2-oxobicyclo[4.3.0]nonane,**  
**(3*S*,6*S*,9*S*)-5j** (see X-ray crystal structure as well):

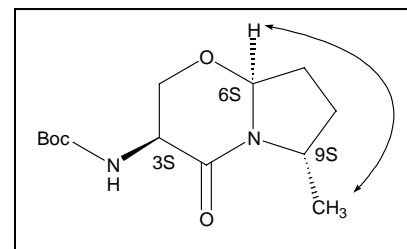

Table 22. <sup>1</sup>H and <sup>13</sup>C NMR data for (3*S*,6*S*,9*S*)-5j

| Position | <sup>13</sup> C, δ, ppm | <sup>1</sup> H(α), δ, ppm, Hz | <sup>1</sup> H(β), δ, ppm, Hz |
|----------|-------------------------|-------------------------------|-------------------------------|
| 2        | 166.6                   | ---                           | ---                           |
| 3        | 49.5                    | 4.30, m                       | ---                           |
| 4        | 68.9                    | 4.30, m                       | 3.61, dd, 9.0; 6.0            |
| 6        | 87.4                    | 5.05, dd, 5.5; 5.0            | ---                           |
| 7        | 31.2                    | 2.22, dddd, 6.5,7.0,7.0, 13.5 | 1.80, dddd, 4.5,7.5,7.5,15.0  |
| 8        | 29.4                    | 1.44, m                       | 2.10, dddd, 7.5,7.5,7.5, 14.0 |
| 9        | 53.7                    | ---                           | 4.23, sextet, 6.5Hz           |
| 10       | 20.7                    | 1.21, d, 6.0 Hz               | ---                           |

|                                  |       |           |     |
|----------------------------------|-------|-----------|-----|
| NH                               | ----- | 5.50, brs | --- |
| OC(O)-N                          | 156.1 | ---       | --- |
| C(CH <sub>3</sub> ) <sub>3</sub> | 80.2  | ---       | --- |
| C(CH <sub>3</sub> ) <sub>3</sub> | 28.5  | 1.40, s   | --- |

**(3R,6R,9S)-1-Aza-3-tert-butoxycarbonylamino-9-methyl-5-oxa-2-oxobicyclo[4.3.0]nonane,  
(3R,6R,9S)-5j:**

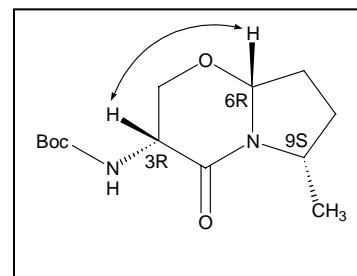

Table 23. <sup>1</sup>H and <sup>13</sup>C NMR data for (3R,6R,9S)-5j

| Position                         | <sup>13</sup> C, δ, ppm | <sup>1</sup> H(α), δ, ppm, Hz | <sup>1</sup> H(β), δ, ppm, Hz |
|----------------------------------|-------------------------|-------------------------------|-------------------------------|
| 2                                | 166.2                   | ---                           | ---                           |
| 3                                | 49.3                    | ---                           | 4.32, q, 7.8                  |
| 4                                | 68.5                    | 3.54, t, 9.0                  | 4.40, t, 9.0                  |
| 6                                | 87.2                    | ---                           | 5.10, t, 6.3                  |
| 7                                | 30.3                    | 1.92-2.01, m                  | 2.19-2.22, m                  |
| 8                                | 29.5                    | 1.65-1.70, m                  | 1.92-2.01, m                  |
| 9                                | 53.2                    | ---                           | 4.09, quintet, 6.6            |
| 10                               | 19.2                    | 1.31, d, 6.6 Hz               | ---                           |
| NH                               | -----                   | 5.49, brs                     | ---                           |
| OC(O)-N                          | 156.1                   | ---                           | ---                           |
| C(CH <sub>3</sub> ) <sub>3</sub> | 80.3                    | ---                           | ---                           |
| C(CH <sub>3</sub> ) <sub>3</sub> | 28.5                    | 1.41, s                       | ---                           |

**(3R,6S,9S)-1-Aza-3-tert-butoxycarbonylamino-9-methyl-5-oxa-2-oxobicyclo[4.3.0]nonane,  
(3R,6S,9S)-5j:**

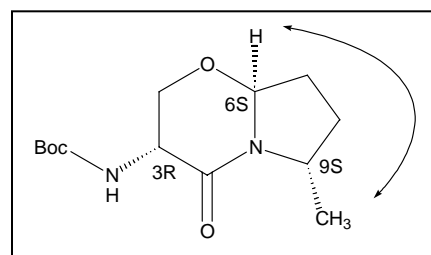

Table 24.  $^1\text{H}$  and  $^{13}\text{C}$  NMR data for (3*R*,6*S*,9*S*)-**5j**

| Position                         | $^{13}\text{C}$ , $\delta$ , ppm | $^1\text{H}(\alpha)$ , $\delta$ , ppm, Hz | $^1\text{H}(\beta)$ , $\delta$ , ppm, Hz |
|----------------------------------|----------------------------------|-------------------------------------------|------------------------------------------|
| 2                                | 165.7                            | ---                                       | ---                                      |
| 3                                | 50.0                             | ---                                       | 4.02, brs                                |
| 4                                | 69.3                             | 3.67, t, 10.8                             | 4.45, brs                                |
| 6                                | 89.2                             | 5.03, dd, 8.8, 5.2                        | ---                                      |
| 7                                | 31.4                             | 2.16-2.21, m                              | 1.69-1.76, m                             |
| 8                                | 21.7                             | 1.39-1.45, m                              | 2.16-2.21, m                             |
| 9                                | 52.6                             | ---                                       | 4.15, sextet, 7.0                        |
| 10                               | 21.7                             | 1.28, d, 6.4 Hz                           | ---                                      |
| NH                               | -----                            | 5.49, brs                                 | ---                                      |
| OC(O)-N                          | 156.2                            | ---                                       | ---                                      |
| C(CH <sub>3</sub> ) <sub>3</sub> | 80.3                             | ---                                       | ---                                      |
| C(CH <sub>3</sub> ) <sub>3</sub> | 28.5                             | 1.41, s                                   | ---                                      |

(3*S*,6*S*)-1-Aza-3-*tert*-butoxycarbonylamino-5-oxa-2-oxobicyclo[4.3.0]nonane, (3*S*,6*S*)-**5k**: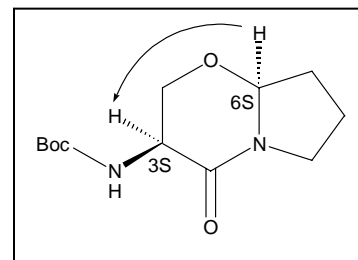Table 25.  $^1\text{H}$  and  $^{13}\text{C}$  NMR data for (3*S*,6*S*)-**5k**

| Position | $^{13}\text{C}$ , $\delta$ , ppm | $^1\text{H}(\alpha)$ , $\delta$ , ppm, Hz | $^1\text{H}(\beta)$ , $\delta$ , ppm, Hz |
|----------|----------------------------------|-------------------------------------------|------------------------------------------|
| 2        | 166.2                            | ---                                       | ---                                      |
| 3        | 49.4                             | 4.22-4.34, m                              | ---                                      |
| 4        | 68.5                             | 4.22-4.34, m                              | 3.55, dd, 9.0, 6.0                       |
| 6        | 86.4                             | 5.01, t, 5.5                              | ---                                      |
| 7        | 32.4                             | 2.15, dddd, 12.0,6.0,6.0,6.0              | 1.82-1.88, m                             |
| 8        | 21.4                             | 1.70-1.77, m                              | 1.89-1.96, m                             |
| 9        | 44.8                             | 3.26, ddd, 12.0, 7.5, 5.5                 | 3.73, ddd, 11.5, 7.0, 7.0                |

|                                  |       |              |     |
|----------------------------------|-------|--------------|-----|
| NH                               | ----- | 5.54, d, 4.5 | --- |
| OC(O)-N                          | 156.0 | ---          | --- |
| C(CH <sub>3</sub> ) <sub>3</sub> | 79.3  | ---          | --- |
| C(CH <sub>3</sub> ) <sub>3</sub> | 28.2  | 1.41, s      | --- |

**(3*S*,6*R*)-1-Aza-3-*tert*-butoxycarbonylamino-5-oxa-2-oxobicyclo[4.3.0]nonane, (3*S*,6*R*)-5k:**

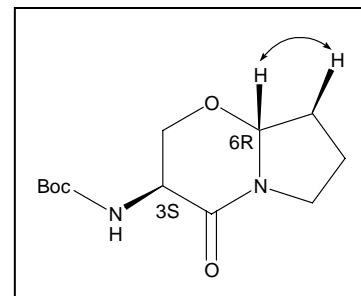

Table 26. <sup>1</sup>H and <sup>13</sup>C NMR data for (3*S*,6*R*)-**5k**

| Position                         | <sup>13</sup> C, δ, ppm | <sup>1</sup> H(α), δ, ppm, Hz | <sup>1</sup> H(β), δ, ppm, Hz          |
|----------------------------------|-------------------------|-------------------------------|----------------------------------------|
| 2                                | 166.0                   | ---                           | ---                                    |
| 3                                | 49.8                    | 3.93-4.01, m                  | ---                                    |
| 4                                | 69.3                    | 3.74, t, 11.0                 | 4.38-4.48, m                           |
| 6                                | 90.0                    | ---                           | 5.00-5.05, m                           |
| 7                                | 31.8                    | 1.73-1.85, m                  | 2.16-2.23, m                           |
| 8                                | 19.7                    | 1.73-1.85, m <sup>a</sup>     | 1.94-2.00, m <sup>a</sup>              |
| 9                                | 43.6                    | 3.41-3.46, m <sup>b</sup>     | 3.68, ddd, 12.0, 8.5, 8.5 <sup>b</sup> |
| NH                               | -----                   | 5.14, brs                     | ---                                    |
| OC(O)-N                          | 156.1                   | ---                           | ---                                    |
| C(CH <sub>3</sub> ) <sub>3</sub> | 80.5                    | ---                           | ---                                    |
| C(CH <sub>3</sub> ) <sub>3</sub> | 28.5                    | 1.41, s                       | ---                                    |

Molecular mechanics data for the stability of diastereomer pairs, 5a and 5b

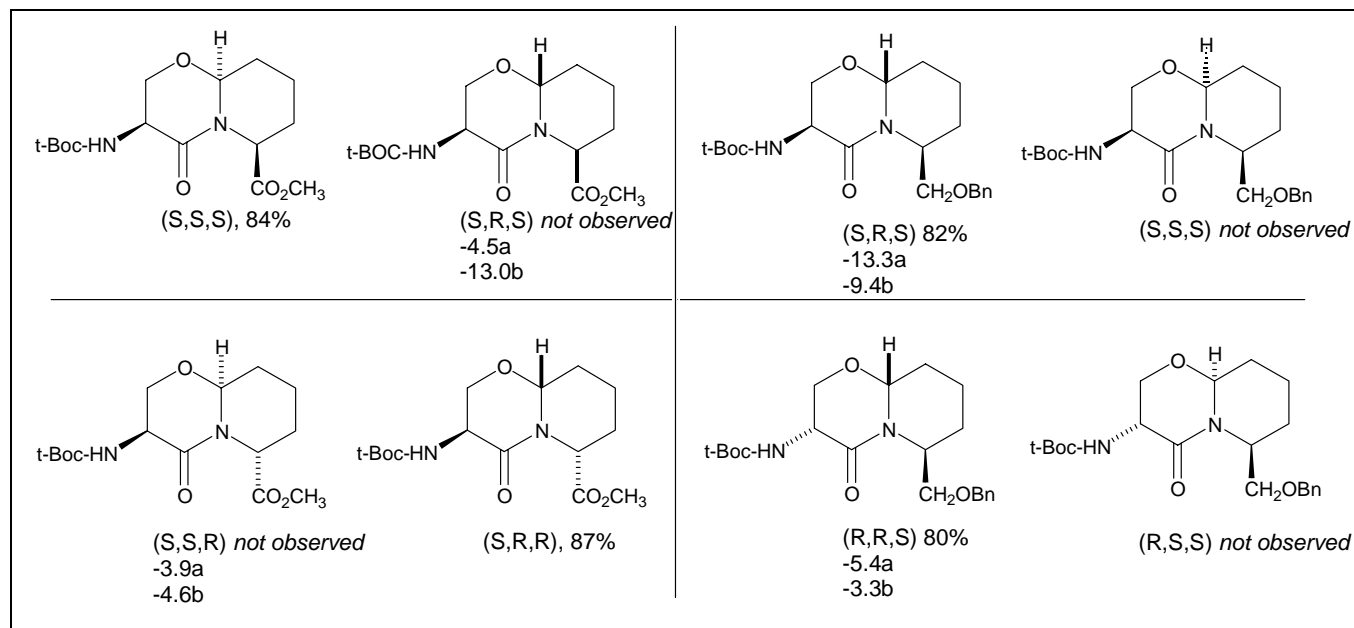

a: by MMFF, b: by Hartree-Fock. Unit: kcal/mole

**Figure S1.** Single crystal X-ray structure of (3*S*,6*S*,10*S*)-**5d**

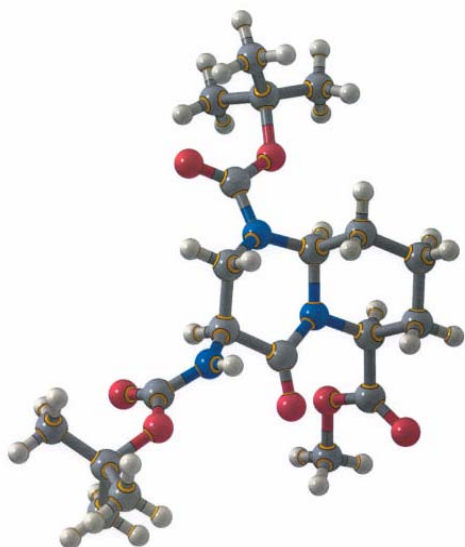

(Adapted from the Supporting Information of Reference 1)

**Figure S2.** X-ray structure of (3*S*,6*S*,9*R*)-**5h**

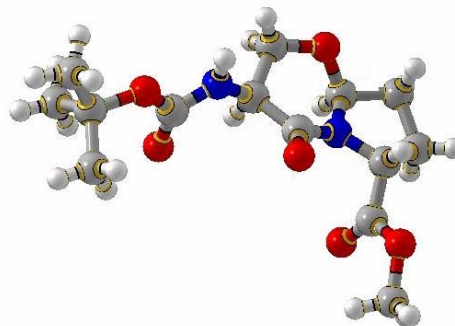

**Figure S3.** X-ray structure of (*R,R,S*)-**5h**

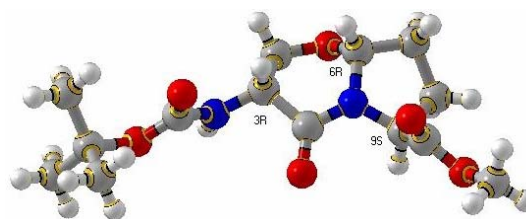

**Figure S4.** X-ray structure of (*S,S,S*)-**5j**

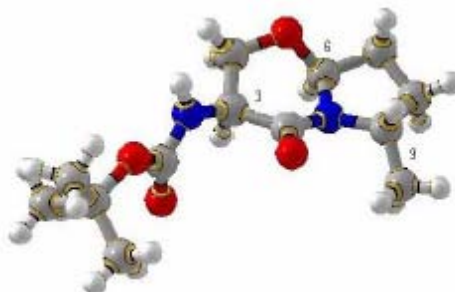

## X-ray Crystallography Data

### (3*S*,6*S*,9*R*)-1-Aza-3-*tert*-butoxycarbonylamino-9-methoxycarbonyl-5-oxa-2-oxobicyclo[4.3.0]-nonane, (3*S*,6*S*,9*R*)-5*h*:

Table 1. Crystal data and structure refinement for (3*S*,6*S*,9*R*)-5*h*:

|                                   |                                                               |                       |
|-----------------------------------|---------------------------------------------------------------|-----------------------|
| Identification code               | (3 <i>S</i> ,6 <i>S</i> ,9 <i>R</i> )-5 <i>h</i>              |                       |
| Empirical formula                 | C <sub>14</sub> H <sub>22</sub> N <sub>2</sub> O <sub>6</sub> |                       |
| Formula weight                    | 314.34                                                        |                       |
| Temperature                       | 293(2) K                                                      |                       |
| Wavelength                        | 0.71073 Å                                                     |                       |
| Crystal system                    | Orthorhombic                                                  |                       |
| Space group                       | P2(1)2(1)2(1)                                                 |                       |
| Unit cell dimensions              | a = 8.8560(18) Å                                              | $\alpha = 90^\circ$ . |
|                                   | b = 10.534(2) Å                                               | $\beta = 90^\circ$ .  |
|                                   | c = 17.443(4) Å                                               | $\gamma = 90^\circ$ . |
| Volume                            | 1627.2(6) Å <sup>3</sup>                                      |                       |
| Z                                 | 4                                                             |                       |
| Density (calculated)              | 1.283 Mg/m <sup>3</sup>                                       |                       |
| Absorption coefficient            | 0.101 mm <sup>-1</sup>                                        |                       |
| F(000)                            | 672                                                           |                       |
| Theta range for data collection   | 2.26 to 28.36°.                                               |                       |
| Index ranges                      | -10 ≤ h ≤ 11, -13 ≤ k ≤ 11, -16 ≤ l ≤ 22                      |                       |
| Reflections collected             | 10015                                                         |                       |
| Independent reflections           | 3657 [R(int) = 0.1565]                                        |                       |
| Completeness to theta = 28.36°    | 93.0 %                                                        |                       |
| Absorption correction             | None                                                          |                       |
| Refinement method                 | Full-matrix least-squares on F <sup>2</sup>                   |                       |
| Data / restraints / parameters    | 3657 / 0 / 212                                                |                       |
| Goodness-of-fit on F <sup>2</sup> | 0.676                                                         |                       |
| Final R indices [I > 2σ(I)]       | R1 = 0.0522, wR2 = 0.0997                                     |                       |
| R indices (all data)              | R1 = 0.2408, wR2 = 0.1337                                     |                       |
| Absolute structure parameter      | -2(2)                                                         |                       |
| Largest diff. peak and hole       | 0.205 and -0.250 e.Å <sup>-3</sup>                            |                       |

Table 2. Atomic coordinates ( $\times 10^4$ ) and equivalent isotropic displacement parameters ( $\text{\AA}^2 \times 10^3$ ) for (3*S*,6*S*,9*R*)-**5h**. U(eq) is defined as one third of the trace of the orthogonalized  $U^{ij}$  tensor.

|       | x       | y       | z        | U(eq)  |
|-------|---------|---------|----------|--------|
| O(4)  | 4978(4) | 9333(3) | -988(2)  | 66(1)  |
| O(1)  | 5504(4) | 3893(4) | -1025(2) | 81(1)  |
| O(6)  | 5633(4) | 8746(3) | 2297(2)  | 68(1)  |
| N(1)  | 4774(4) | 7138(3) | -790(2)  | 53(1)  |
| O(3)  | 5937(4) | 6431(3) | 266(2)   | 66(1)  |
| N(2)  | 5339(4) | 8710(4) | 1045(2)  | 59(1)  |
| C(10) | 4724(7) | 8398(5) | 1714(3)  | 53(1)  |
| O(5)  | 3516(5) | 7859(3) | 1783(2)  | 72(1)  |
| C(4)  | 4614(6) | 6456(5) | -2071(2) | 61(2)  |
| C(6)  | 4203(7) | 8236(5) | -1231(3) | 58(2)  |
| C(3)  | 5265(6) | 6070(5) | -1275(3) | 52(2)  |
| C(2)  | 4525(8) | 4846(6) | -986(3)  | 58(2)  |
| O(2)  | 3244(5) | 4744(3) | -750(2)  | 78(1)  |
| C(9)  | 5187(6) | 7251(5) | -57(3)   | 53(2)  |
| C(8)  | 4593(6) | 8457(5) | 324(3)   | 53(2)  |
| C(11) | 5144(6) | 8626(5) | 3104(3)  | 62(2)  |
| C(12) | 5025(8) | 7221(5) | 3310(3)  | 112(2) |
| C(5)  | 4645(6) | 7919(5) | -2043(2) | 68(2)  |
| C(1)  | 4886(8) | 2670(5) | -783(3)  | 120(3) |
| C(7)  | 4726(7) | 9625(4) | -205(3)  | 80(2)  |
| C(14) | 6416(6) | 9268(6) | 3533(3)  | 93(2)  |
| C(13) | 3708(6) | 9335(5) | 3234(3)  | 91(2)  |



Table 3. Bond lengths [ $\text{\AA}$ ] and angles [ $^\circ$ ] for (3*S*,6*S*,9*R*)-**5h**.

---

|                  |          |
|------------------|----------|
| O(4)-C(6)        | 1.410(6) |
| O(4)-C(7)        | 1.417(5) |
| O(1)-C(2)        | 1.328(6) |
| O(1)-C(1)        | 1.463(6) |
| O(6)-C(10)       | 1.347(5) |
| O(6)-C(11)       | 1.478(5) |
| N(1)-C(9)        | 1.335(5) |
| N(1)-C(3)        | 1.474(5) |
| N(1)-C(6)        | 1.479(5) |
| O(3)-C(9)        | 1.227(5) |
| N(2)-C(10)       | 1.329(6) |
| N(2)-C(8)        | 1.446(6) |
| C(10)-O(5)       | 1.217(5) |
| C(4)-C(5)        | 1.542(6) |
| C(4)-C(3)        | 1.557(6) |
| C(6)-C(5)        | 1.507(6) |
| C(3)-C(2)        | 1.532(7) |
| C(2)-O(2)        | 1.212(6) |
| C(9)-C(8)        | 1.527(7) |
| C(8)-C(7)        | 1.542(6) |
| C(11)-C(13)      | 1.492(6) |
| C(11)-C(14)      | 1.512(6) |
| C(11)-C(12)      | 1.527(6) |
|                  |          |
| C(6)-O(4)-C(7)   | 113.0(4) |
| C(2)-O(1)-C(1)   | 114.0(5) |
| C(10)-O(6)-C(11) | 121.3(4) |
| C(9)-N(1)-C(3)   | 122.5(4) |
| C(9)-N(1)-C(6)   | 121.5(4) |
| C(3)-N(1)-C(6)   | 113.5(4) |
| C(10)-N(2)-C(8)  | 122.1(4) |
| O(5)-C(10)-N(2)  | 124.3(5) |
| O(5)-C(10)-O(6)  | 125.2(5) |
| N(2)-C(10)-O(6)  | 110.5(5) |
| C(5)-C(4)-C(3)   | 103.1(4) |
| O(4)-C(6)-N(1)   | 108.5(4) |
| O(4)-C(6)-C(5)   | 109.7(5) |

|                   |          |
|-------------------|----------|
| N(1)-C(6)-C(5)    | 103.2(4) |
| N(1)-C(3)-C(2)    | 109.1(4) |
| N(1)-C(3)-C(4)    | 101.8(4) |
| C(2)-C(3)-C(4)    | 110.8(4) |
| O(2)-C(2)-O(1)    | 124.2(6) |
| O(2)-C(2)-C(3)    | 125.9(6) |
| O(1)-C(2)-C(3)    | 109.9(5) |
| O(3)-C(9)-N(1)    | 121.6(5) |
| O(3)-C(9)-C(8)    | 125.0(5) |
| N(1)-C(9)-C(8)    | 113.3(5) |
| N(2)-C(8)-C(9)    | 112.0(4) |
| N(2)-C(8)-C(7)    | 109.8(4) |
| C(9)-C(8)-C(7)    | 112.2(4) |
| O(6)-C(11)-C(13)  | 110.7(4) |
| O(6)-C(11)-C(14)  | 102.5(4) |
| C(13)-C(11)-C(14) | 109.6(4) |
| O(6)-C(11)-C(12)  | 109.1(4) |
| C(13)-C(11)-C(12) | 112.9(5) |
| C(14)-C(11)-C(12) | 111.6(5) |
| C(6)-C(5)-C(4)    | 104.3(4) |
| O(4)-C(7)-C(8)    | 114.6(4) |

---

Symmetry transformations used to generate equivalent atoms:

Table 4. Anisotropic displacement parameters ( $\text{\AA}^2 \times 10^3$ ) for (3*S*,6*S*,9*R*)-**5h**. The anisotropic displacement factor exponent takes the form:  $-2\pi^2 [ h^2 a^{*2} U^{11} + \dots + 2 h k a^* b^* U^{12} ]$

|       | U <sup>11</sup> | U <sup>22</sup> | U <sup>33</sup> | U <sup>23</sup> | U <sup>13</sup> | U <sup>12</sup> |
|-------|-----------------|-----------------|-----------------|-----------------|-----------------|-----------------|
| O(4)  | 94(3)           | 45(2)           | 59(2)           | 10(2)           | -3(2)           | -19(2)          |
| O(1)  | 106(3)          | 53(2)           | 83(3)           | 4(2)            | 17(2)           | 22(3)           |
| O(6)  | 79(3)           | 88(3)           | 38(2)           | -10(2)          | 0(2)            | -4(2)           |
| N(1)  | 67(3)           | 46(3)           | 46(3)           | -2(2)           | 0(2)            | 5(3)            |
| O(3)  | 83(3)           | 63(3)           | 51(2)           | 1(2)            | -7(2)           | 11(2)           |
| N(2)  | 70(3)           | 69(3)           | 36(3)           | -4(2)           | -3(2)           | -10(3)          |
| C(10) | 65(5)           | 55(3)           | 37(3)           | -1(3)           | 0(4)            | -2(3)           |
| O(5)  | 71(3)           | 80(3)           | 64(2)           | 5(2)            | 4(2)            | -12(2)          |
| C(4)  | 72(4)           | 78(4)           | 34(3)           | -2(3)           | 1(3)            | 0(3)            |
| C(6)  | 86(5)           | 46(4)           | 42(3)           | 19(3)           | -3(3)           | 9(4)            |
| C(3)  | 60(4)           | 44(3)           | 52(3)           | -1(3)           | 4(3)            | -1(4)           |
| C(2)  | 66(5)           | 69(4)           | 39(3)           | 2(3)            | 1(3)            | 3(4)            |
| O(2)  | 88(4)           | 54(2)           | 92(3)           | 7(2)            | 11(3)           | -3(3)           |
| C(9)  | 59(4)           | 47(4)           | 53(4)           | 11(3)           | -4(3)           | 1(3)            |
| C(8)  | 65(4)           | 49(3)           | 44(3)           | 2(3)            | -5(3)           | 0(4)            |
| C(11) | 74(5)           | 72(4)           | 41(3)           | -4(3)           | 7(3)            | 8(4)            |
| C(12) | 186(8)          | 73(4)           | 77(4)           | 15(4)           | -3(5)           | 0(5)            |
| C(5)  | 90(5)           | 74(4)           | 39(3)           | 13(3)           | 2(3)            | -6(4)           |
| C(1)  | 207(8)          | 28(3)           | 124(5)          | 17(4)           | 48(5)           | 13(5)           |
| C(7)  | 136(6)          | 50(4)           | 54(4)           | 8(3)            | -18(4)          | -10(4)          |
| C(14) | 94(5)           | 122(6)          | 62(4)           | -14(4)          | -10(4)          | -6(4)           |
| C(13) | 84(5)           | 105(5)          | 83(4)           | -14(4)          | 5(4)            | 24(4)           |

Table 5. Hydrogen coordinates ( $\times 10^4$ ) and isotropic displacement parameters ( $\text{\AA}^2 \times 10^{-3}$ ) for (3*S*,6*S*,9*R*)-**5h**.

|        | x        | y        | z         | U(eq) |
|--------|----------|----------|-----------|-------|
| H(2)   | 6208     | 9074     | 1041      | 70    |
| H(4A)  | 5239     | 6136     | -2485     | 73    |
| H(4B)  | 3592     | 6142     | -2136     | 73    |
| H(6)   | 3110(50) | 8330(40) | -1180(20) | 70    |
| H(3)   | 6370(50) | 6000(40) | -1290(20) | 63    |
| H(8)   | 3520(40) | 8330(40) | 430(20)   | 63    |
| H(12A) | 5972     | 6810     | 3208      | 168   |
| H(12B) | 4246     | 6833     | 3008      | 168   |
| H(12C) | 4784     | 7137     | 3844      | 168   |
| H(5A)  | 5647     | 8238     | -2159     | 81    |
| H(5B)  | 3932     | 8277     | -2405     | 81    |
| H(1A)  | 4140     | 2394     | -1146     | 180   |
| H(1B)  | 4429     | 2757     | -287      | 180   |
| H(1C)  | 5684     | 2054     | -757      | 180   |
| H(7A)  | 3806     | 10119    | -165      | 96    |
| H(7B)  | 5551     | 10152    | -24       | 96    |
| H(14A) | 6610     | 10085    | 3311      | 139   |
| H(14B) | 7310     | 8755     | 3501      | 139   |
| H(14C) | 6136     | 9370     | 4061      | 139   |
| H(13A) | 2903     | 8929     | 2959      | 136   |
| H(13B) | 3819     | 10192    | 3057      | 136   |
| H(13C) | 3476     | 9338     | 3772      | 136   |

**(3R,6R,9S)-1-Aza-3-tert-butoxycarbonylamino-9-methoxycarbonyl-5-oxa-2-oxobicyclo[4.3.0]-nonane, (3R,6R,9S)-5h:**

Table 1. Crystal data and structure refinement for (3R,6R,9S)-5h:

|                                   |                                             |                       |
|-----------------------------------|---------------------------------------------|-----------------------|
| Identification code               | (3R,6R,9S)-5h                               |                       |
| Empirical formula                 | C14 H22 N2 O6                               |                       |
| Formula weight                    | 314.34                                      |                       |
| Temperature                       | 273(2) K                                    |                       |
| Wavelength                        | 0.71073 Å                                   |                       |
| Crystal system                    | Orthorhombic                                |                       |
| Space group                       | P2(1)2(1)2(1)                               |                       |
| Unit cell dimensions              | a = 9.474(4) Å                              | $\alpha = 90^\circ$ . |
|                                   | b = 11.504(5) Å                             | $\beta = 90^\circ$ .  |
|                                   | c = 16.118(7) Å                             | $\gamma = 90^\circ$ . |
| Volume                            | 1756.8(13) Å <sup>3</sup>                   |                       |
| Z                                 | 4                                           |                       |
| Density (calculated)              | 1.188 Mg/m <sup>3</sup>                     |                       |
| Absorption coefficient            | 0.093 mm <sup>-1</sup>                      |                       |
| F(000)                            | 672                                         |                       |
| Theta range for data collection   | 2.17 to 28.12°.                             |                       |
| Index ranges                      | -12 ≤ h ≤ 12, -10 ≤ k ≤ 14, -20 ≤ l ≤ 20    |                       |
| Reflections collected             | 8718                                        |                       |
| Independent reflections           | 3709 [R(int) = 0.2158]                      |                       |
| Completeness to theta = 28.12°    | 90.7 %                                      |                       |
| Absorption correction             | None                                        |                       |
| Refinement method                 | Full-matrix least-squares on F <sup>2</sup> |                       |
| Data / restraints / parameters    | 3709 / 0 / 212                              |                       |
| Goodness-of-fit on F <sup>2</sup> | 0.678                                       |                       |
| Final R indices [I > 2σ(I)]       | R1 = 0.0786, wR2 = 0.1768                   |                       |
| R indices (all data)              | R1 = 0.3102, wR2 = 0.2326                   |                       |
| Absolute structure parameter      | 5(4)                                        |                       |
| Largest diff. peak and hole       | 0.227 and -0.320 e.Å <sup>-3</sup>          |                       |

Table 2. Atomic coordinates ( $\times 10^4$ ) and equivalent isotropic displacement parameters ( $\text{\AA}^2 \times 10^3$ ) for (3*R*,6*R*,9*S*)-**5h**. U(eq) is defined as one third of the trace of the orthogonalized  $U^{ij}$  tensor.

|       | x        | y        | z        | U(eq)  |
|-------|----------|----------|----------|--------|
| O(3)  | 4877(6)  | 8213(4)  | 11659(3) | 77(2)  |
| N(1)  | 4847(7)  | 6644(5)  | 10732(4) | 57(2)  |
| O(4)  | 6191(6)  | 6925(5)  | 9578(3)  | 78(2)  |
| O(6)  | 5716(6)  | 10312(4) | 8364(3)  | 80(2)  |
| O(5)  | 3655(7)  | 9358(6)  | 8629(4)  | 89(2)  |
| C(3)  | 5358(10) | 5449(8)  | 10940(5) | 70(3)  |
| N(2)  | 5488(7)  | 9304(5)  | 9536(4)  | 77(2)  |
| C(11) | 5263(10) | 10842(7) | 7572(4)  | 74(3)  |
| C(9)  | 5367(10) | 7284(7)  | 10119(5) | 65(2)  |
| C(8)  | 4838(9)  | 8538(7)  | 10136(4) | 59(2)  |
| C(5)  | 4065(9)  | 6307(7)  | 12109(5) | 82(3)  |
| C(6)  | 4100(9)  | 7189(8)  | 11417(5) | 68(3)  |
| C(2)  | 4561(14) | 4523(9)  | 10527(6) | 90(3)  |
| C(7)  | 4954(10) | 9038(6)  | 11001(4) | 82(3)  |
| O(1)  | 5193(9)  | 3504(6)  | 10616(4) | 145(3) |
| O(2)  | 3409(8)  | 4628(5)  | 10183(5) | 103(2) |
| C(4)  | 5308(9)  | 5462(7)  | 11887(4) | 83(3)  |
| C(10) | 4843(12) | 9619(7)  | 8816(6)  | 76(3)  |
| C(14) | 4948(14) | 9929(7)  | 6948(4)  | 140(5) |
| C(13) | 4012(9)  | 11654(7) | 7739(5)  | 101(3) |
| C(1)  | 4439(16) | 2474(8)  | 10300(7) | 194(7) |
| C(12) | 6548(10) | 11582(8) | 7350(6)  | 129(4) |

Table 3. Bond lengths [ $\text{\AA}$ ] and angles [ $^\circ$ ] for (3*R*,6*R*,9*S*)-**5h**.

---

|                   |           |
|-------------------|-----------|
| O(3)-C(7)         | 1.426(7)  |
| O(3)-C(6)         | 1.442(9)  |
| N(1)-C(9)         | 1.328(9)  |
| N(1)-C(6)         | 1.453(9)  |
| N(1)-C(3)         | 1.495(10) |
| O(4)-C(9)         | 1.240(8)  |
| O(6)-C(10)        | 1.360(9)  |
| O(6)-C(11)        | 1.479(7)  |
| O(5)-C(10)        | 1.203(10) |
| C(3)-C(2)         | 1.466(13) |
| C(3)-C(4)         | 1.526(9)  |
| N(2)-C(10)        | 1.362(11) |
| N(2)-C(8)         | 1.445(9)  |
| C(11)-C(14)       | 1.485(9)  |
| C(11)-C(12)       | 1.528(10) |
| C(11)-C(13)       | 1.533(10) |
| C(9)-C(8)         | 1.527(10) |
| C(8)-C(7)         | 1.512(9)  |
| C(5)-C(6)         | 1.509(9)  |
| C(5)-C(4)         | 1.568(10) |
| C(2)-O(2)         | 1.230(11) |
| C(2)-O(1)         | 1.325(11) |
| O(1)-C(1)         | 1.474(12) |
|                   |           |
| C(7)-O(3)-C(6)    | 111.6(5)  |
| C(9)-N(1)-C(6)    | 120.4(6)  |
| C(9)-N(1)-C(3)    | 123.8(7)  |
| C(6)-N(1)-C(3)    | 112.6(6)  |
| C(10)-O(6)-C(11)  | 121.8(7)  |
| C(2)-C(3)-N(1)    | 113.5(7)  |
| C(2)-C(3)-C(4)    | 116.5(8)  |
| N(1)-C(3)-C(4)    | 101.8(6)  |
| C(10)-N(2)-C(8)   | 122.8(8)  |
| O(6)-C(11)-C(14)  | 110.5(6)  |
| O(6)-C(11)-C(12)  | 101.6(7)  |
| C(14)-C(11)-C(12) | 113.3(8)  |
| O(6)-C(11)-C(13)  | 109.0(6)  |

|                   |           |
|-------------------|-----------|
| C(14)-C(11)-C(13) | 113.2(8)  |
| C(12)-C(11)-C(13) | 108.5(7)  |
| O(4)-C(9)-N(1)    | 124.9(7)  |
| O(4)-C(9)-C(8)    | 122.2(8)  |
| N(1)-C(9)-C(8)    | 112.9(7)  |
| N(2)-C(8)-C(7)    | 110.7(6)  |
| N(2)-C(8)-C(9)    | 115.1(7)  |
| C(7)-C(8)-C(9)    | 110.6(6)  |
| C(6)-C(5)-C(4)    | 103.4(6)  |
| O(3)-C(6)-N(1)    | 108.1(7)  |
| O(3)-C(6)-C(5)    | 111.1(6)  |
| N(1)-C(6)-C(5)    | 106.3(7)  |
| O(2)-C(2)-O(1)    | 122.5(10) |
| O(2)-C(2)-C(3)    | 126.2(10) |
| O(1)-C(2)-C(3)    | 111.2(10) |
| O(3)-C(7)-C(8)    | 115.4(5)  |
| C(2)-O(1)-C(1)    | 117.1(9)  |
| C(3)-C(4)-C(5)    | 104.9(6)  |
| O(5)-C(10)-O(6)   | 125.5(10) |
| O(5)-C(10)-N(2)   | 124.5(9)  |
| O(6)-C(10)-N(2)   | 109.9(10) |

---

Symmetry transformations used to generate equivalent atoms:



Table 4. Anisotropic displacement parameters ( $\text{\AA}^2 \times 10^3$ ) for (3*R*,6*R*,9*S*)-**5h**. The anisotropic displacement factor exponent takes the form:  $-2\pi^2 [ h^2 a^{*2} U^{11} + \dots + 2 h k a^* b^* U^{12} ]$

|       | U <sup>11</sup> | U <sup>22</sup> | U <sup>33</sup> | U <sup>23</sup> | U <sup>13</sup> | U <sup>12</sup> |
|-------|-----------------|-----------------|-----------------|-----------------|-----------------|-----------------|
| O(3)  | 85(5)           | 77(4)           | 68(3)           | -2(3)           | -1(3)           | -8(4)           |
| N(1)  | 63(5)           | 57(4)           | 50(4)           | 8(3)            | 13(4)           | -6(4)           |
| O(4)  | 79(5)           | 82(4)           | 71(4)           | -1(3)           | 12(3)           | -10(4)          |
| O(6)  | 65(4)           | 85(4)           | 89(4)           | 36(3)           | 2(3)            | 9(4)            |
| O(5)  | 57(4)           | 117(5)          | 92(4)           | 17(4)           | -7(4)           | 2(5)            |
| C(3)  | 71(7)           | 61(5)           | 78(6)           | 9(5)            | 0(6)            | 10(6)           |
| N(2)  | 61(5)           | 80(4)           | 90(5)           | 24(4)           | -17(4)          | -9(4)           |
| C(11) | 72(7)           | 92(6)           | 57(5)           | 32(5)           | 2(5)            | 19(6)           |
| C(9)  | 67(7)           | 73(6)           | 54(5)           | -4(5)           | 2(5)            | -12(5)          |
| C(8)  | 66(6)           | 58(5)           | 52(5)           | 19(4)           | 7(5)            | 5(5)            |
| C(5)  | 80(7)           | 99(6)           | 67(6)           | 10(5)           | -2(5)           | 9(6)            |
| C(6)  | 74(7)           | 77(6)           | 53(5)           | 7(5)            | -6(5)           | -5(6)           |
| C(2)  | 101(10)         | 62(7)           | 108(8)          | -1(6)           | 10(7)           | 9(8)            |
| C(7)  | 108(9)          | 60(5)           | 79(6)           | 5(4)            | 12(6)           | -9(6)           |
| O(1)  | 167(8)          | 57(4)           | 210(7)          | -18(4)          | -50(7)          | 38(5)           |
| O(2)  | 85(6)           | 77(4)           | 147(6)          | -15(4)          | 10(5)           | -9(4)           |
| C(4)  | 75(7)           | 91(6)           | 83(6)           | 13(5)           | -2(5)           | 9(6)            |
| C(10) | 79(9)           | 61(6)           | 88(7)           | 10(5)           | 16(7)           | 16(7)           |
| C(14) | 255(15)         | 106(7)          | 58(5)           | 5(5)            | 6(8)            | 35(9)           |
| C(13) | 79(8)           | 92(6)           | 132(8)          | 24(6)           | 7(6)            | 32(6)           |
| C(1)  | 280(20)         | 59(6)           | 242(13)         | -27(7)          | -46(14)         | 4(10)           |
| C(12) | 77(8)           | 137(9)          | 174(10)         | 62(8)           | 22(7)           | -6(7)           |

Table 5. Hydrogen coordinates ( $\times 10^4$ ) and isotropic displacement parameters ( $\text{\AA}^2 \times 10^{-3}$ ) for (3*R*,6*R*,9*S*)-**5h**.

|        | x        | y        | z         | U(eq) |
|--------|----------|----------|-----------|-------|
| H(3)   | 6350(80) | 5390(60) | 10770(40) | 84    |
| H(2)   | 6317     | 9572     | 9639      | 92    |
| H(8)   | 3830(70) | 8510(60) | 10000(40) | 70    |
| H(5A)  | 3170     | 5897     | 12120     | 99    |
| H(5B)  | 4219     | 6674     | 12643     | 99    |
| H(6)   | 3140(80) | 7400(60) | 11250(40) | 82    |
| H(7A)  | 5844     | 9450     | 11045     | 99    |
| H(7B)  | 4204     | 9603     | 11076     | 99    |
| H(4A)  | 6192     | 5744     | 12114     | 99    |
| H(4B)  | 5129     | 4689     | 12103     | 99    |
| H(14A) | 5779     | 9471     | 6852      | 209   |
| H(14B) | 4657     | 10288    | 6439      | 209   |
| H(14C) | 4205     | 9438     | 7151      | 209   |
| H(13A) | 3227     | 11209    | 7941      | 152   |
| H(13B) | 3749     | 12040    | 7234      | 152   |
| H(13C) | 4276     | 12223    | 8146      | 152   |
| H(1A)  | 3477     | 2493     | 10487     | 291   |
| H(1B)  | 4888     | 1782     | 10503     | 291   |
| H(1C)  | 4460     | 2476     | 9705      | 291   |
| H(12A) | 6746     | 12112    | 7795      | 194   |
| H(12B) | 6357     | 12014    | 6852      | 194   |
| H(12C) | 7349     | 11086    | 7262      | 194   |

**(3*S*,6*S*,9*S*)-1-Aza-3-tert-butoxycarbonylamino-9-methyl-5-oxa-2-oxobicyclo [4.3.0]nonane,  
(3*S*,6*S*,9*S*)-5j:**

Table 1. Crystal data and structure refinement for (3*S*,6*S*,9*S*)-5j

|                                   |                                             |                               |
|-----------------------------------|---------------------------------------------|-------------------------------|
| Identification code               | (3 <i>S</i> ,6 <i>S</i> ,9 <i>S</i> )-5j    |                               |
| Empirical formula                 | C13 H21 N2 O4                               |                               |
| Formula weight                    | 269.32                                      |                               |
| Temperature                       | 273(2) K                                    |                               |
| Wavelength                        | 0.71073 Å                                   |                               |
| Crystal system                    |                                             |                               |
| Space group                       | P(2)1                                       |                               |
| Unit cell dimensions              | a = 10.050(8) Å                             | $\alpha = 90^\circ$ .         |
|                                   | b = 6.229(5) Å                              | $\beta = 101.780(13)^\circ$ . |
|                                   | c = 12.106(9) Å                             | $\gamma = 90^\circ$ .         |
| Volume                            | 741.9(10) Å <sup>3</sup>                    |                               |
| Z                                 | 2                                           |                               |
| Density (calculated)              | 1.206 Mg/m <sup>3</sup>                     |                               |
| Absorption coefficient            | 0.089 mm <sup>-1</sup>                      |                               |
| F(000)                            | 290                                         |                               |
| Theta range for data collection   | 1.72 to 23.28°.                             |                               |
| Index ranges                      | -10 ≤ h ≤ 11, -6 ≤ k ≤ 6, -11 ≤ l ≤ 13      |                               |
| Reflections collected             | 2813                                        |                               |
| Independent reflections           | 1926 [R(int) = 0.0696]                      |                               |
| Completeness to theta = 23.28°    | 99.6 %                                      |                               |
| Refinement method                 | Full-matrix least-squares on F <sup>2</sup> |                               |
| Data / restraints / parameters    | 1926 / 1 / 90                               |                               |
| Goodness-of-fit on F <sup>2</sup> | 1.171                                       |                               |
| Final R indices [I > 2σ(I)]       | R1 = 0.1406, wR2 = 0.3364                   |                               |
| R indices (all data)              | R1 = 0.1890, wR2 = 0.3720                   |                               |
| Absolute structure parameter      | 2(6)                                        |                               |
| Largest diff. peak and hole       | 0.622 and -0.456 e.Å <sup>-3</sup>          |                               |

Table 2. Atomic coordinates ( $\times 10^4$ ) and equivalent isotropic displacement parameters ( $\text{\AA}^2 \times 10^3$ ) for (3*S*,6*S*,9*S*)-**5j**.  $U(\text{eq})$  is defined as one third of the trace of the orthogonalized  $U^{ij}$  tensor.

|       | x        | y        | z         | U(eq)  |
|-------|----------|----------|-----------|--------|
| C(7)  | 2139(9)  | 3062(16) | 1094(8)   | 59(2)  |
| C(8)  | 2567(9)  | 4342(16) | 142(9)    | 60(2)  |
| O(2)  | 971(6)   | 993(10)  | -534(6)   | 73(2)  |
| O(4)  | 1772(7)  | 6997(12) | 3139(6)   | 79(2)  |
| N(1)  | 2839(7)  | 3160(12) | -684(7)   | 62(2)  |
| O(3)  | 3622(7)  | 4920(11) | 3105(7)   | 84(2)  |
| N(2)  | 1613(8)  | 4441(13) | 1860(7)   | 69(2)  |
| C(5)  | 2271(10) | 1032(17) | -886(9)   | 69(3)  |
| O(1)  | 2691(7)  | 6305(13) | 210(7)    | 92(2)  |
| C(6)  | 1152(10) | 1280(20) | 677(10)   | 83(3)  |
| C(2)  | 3170(11) | 4150(19) | -1721(10) | 75(3)  |
| C(4)  | 2070(11) | 640(20)  | -2153(10) | 90(4)  |
| C(9)  | 2456(10) | 5408(17) | 2743(9)   | 70(3)  |
| C(10) | 2339(9)  | 8135(18) | 4210(9)   | 72(3)  |
| C(1)  | 4474(12) | 5250(20) | -1557(12) | 100(4) |
| C(12) | 1201(14) | 9700(20) | 4329(13)  | 112(4) |
| C(3)  | 3095(14) | 2100(20) | -2482(12) | 106(4) |
| C(11) | 2600(14) | 6510(30) | 5204(13)  | 115(4) |
| C(13) | 3582(13) | 9340(20) | 4096(13)  | 109(4) |

Table 3. Bond lengths [ $\text{\AA}$ ] and angles [ $^\circ$ ] for (3*S*,6*S*,9*S*)-**5j**.

---

|                 |           |
|-----------------|-----------|
| C(7)-N(2)       | 1.442(12) |
| C(7)-C(6)       | 1.506(14) |
| C(7)-C(8)       | 1.534(14) |
| C(8)-O(1)       | 1.230(12) |
| C(8)-N(1)       | 1.314(13) |
| O(2)-C(6)       | 1.451(13) |
| O(2)-C(5)       | 1.454(11) |
| O(4)-C(9)       | 1.348(12) |
| O(4)-C(10)      | 1.486(13) |
| N(1)-C(5)       | 1.444(13) |
| N(1)-C(2)       | 1.496(14) |
| O(3)-C(9)       | 1.203(10) |
| N(2)-C(9)       | 1.361(12) |
| C(5)-C(4)       | 1.526(16) |
| C(2)-C(1)       | 1.456(16) |
| C(2)-C(3)       | 1.569(19) |
| C(4)-C(3)       | 1.488(17) |
| C(10)-C(13)     | 1.486(15) |
| C(10)-C(12)     | 1.532(17) |
| C(10)-C(11)     | 1.555(18) |
|                 |           |
| N(2)-C(7)-C(6)  | 110.6(7)  |
| N(2)-C(7)-C(8)  | 111.7(7)  |
| C(6)-C(7)-C(8)  | 113.4(8)  |
| O(1)-C(8)-N(1)  | 125.0(10) |
| O(1)-C(8)-C(7)  | 120.4(10) |
| N(1)-C(8)-C(7)  | 114.5(8)  |
| C(6)-O(2)-C(5)  | 111.1(8)  |
| C(9)-O(4)-C(10) | 121.9(8)  |
| C(8)-N(1)-C(5)  | 120.4(8)  |
| C(8)-N(1)-C(2)  | 121.6(8)  |
| C(5)-N(1)-C(2)  | 112.6(8)  |
| C(9)-N(2)-C(7)  | 121.2(8)  |
| N(1)-C(5)-O(2)  | 108.3(8)  |
| N(1)-C(5)-C(4)  | 106.6(9)  |
| O(2)-C(5)-C(4)  | 110.5(9)  |
| O(2)-C(6)-C(7)  | 111.6(9)  |

|                   |           |
|-------------------|-----------|
| C(1)-C(2)-N(1)    | 115.3(10) |
| C(1)-C(2)-C(3)    | 113.4(10) |
| N(1)-C(2)-C(3)    | 99.5(9)   |
| C(3)-C(4)-C(5)    | 102.3(11) |
| O(3)-C(9)-O(4)    | 125.9(10) |
| O(3)-C(9)-N(2)    | 125.3(9)  |
| O(4)-C(9)-N(2)    | 108.9(8)  |
| O(4)-C(10)-C(13)  | 109.9(9)  |
| O(4)-C(10)-C(12)  | 103.0(9)  |
| C(13)-C(10)-C(12) | 110.2(10) |
| O(4)-C(10)-C(11)  | 109.8(9)  |
| C(13)-C(10)-C(11) | 112.8(11) |
| C(12)-C(10)-C(11) | 110.7(10) |
| C(4)-C(3)-C(2)    | 107.1(10) |

---

Symmetry transformations used to generate equivalent atoms:

Table 4. Anisotropic displacement parameters ( $\text{\AA}^2 \times 10^3$ ) for (3S,6S,9S)-**5j**. The anisotropic displacement factor exponent takes the form:  $-2\pi^2 [ h^2 a^{*2}U^{11} + \dots + 2 h k a^* b^* U^{12} ]$

|       | U <sup>11</sup> | U <sup>22</sup> | U <sup>33</sup> | U <sup>23</sup> | U <sup>13</sup> | U <sup>12</sup> |
|-------|-----------------|-----------------|-----------------|-----------------|-----------------|-----------------|
| C(1)  | 68(5)           | 54(5)           | 65(5)           | -1(5)           | 7(4)            | 3(4)            |
| O(4)  | 75(3)           | 110(4)          | 69(3)           | 28(3)           | -3(3)           | -14(3)          |
| O(1)  | 76(3)           | 102(4)          | 57(3)           | 10(3)           | 15(3)           | 16(3)           |
| O(3)  | 65(3)           | 131(5)          | 71(3)           | 13(4)           | -11(3)          | -15(3)          |
| N(2)  | 54(3)           | 110(5)          | 58(4)           | 10(4)           | 0(3)            | -9(3)           |
| N(1)  | 68(3)           | 76(4)           | 49(4)           | 5(4)            | 13(3)           | 8(4)            |
| C(2)  | 85(6)           | 84(7)           | 59(5)           | -1(5)           | 28(4)           | 0(5)            |
| C(3)  | 59(4)           | 85(5)           | 55(4)           | 0(5)            | 8(4)            | -13(4)          |
| O(2)  | 125(5)          | 75(5)           | 79(4)           | 1(4)            | 31(3)           | 6(3)            |
| C(4)  | 99(6)           | 100(6)          | 63(5)           | 7(5)            | 26(4)           | 13(5)           |
| C(5)  | 125(7)          | 101(6)          | 72(6)           | 20(6)           | 38(5)           | 22(6)           |
| C(6)  | 76(5)           | 95(6)           | 70(5)           | 2(6)            | 21(4)           | 13(4)           |
| C(7)  | 73(5)           | 91(5)           | 53(4)           | 0(5)            | -4(4)           | 3(5)            |
| C(8)  | 98(6)           | 139(8)          | 77(6)           | -10(6)          | 19(5)           | 42(6)           |
| C(9)  | 92(6)           | 91(6)           | 56(5)           | 11(5)           | 22(4)           | 18(5)           |
| C(10) | 128(7)          | 132(9)          | 92(7)           | 32(7)           | 12(6)           | -38(7)          |
| C(11) | 117(7)          | 115(7)          | 82(6)           | 2(7)            | 36(6)           | 17(6)           |
| C(12) | 134(9)          | 169(11)         | 72(6)           | -21(7)          | 32(6)           | -20(8)          |
| C(13) | 113(7)          | 126(8)          | 106(7)          | 10(8)           | 39(6)           | 25(7)           |

Table 5. Hydrogen coordinates ( $\times 10^4$ ) and isotropic displacement parameters ( $\text{\AA}^2 \times 10^{-3}$ ) for (3*S*,6*S*,9*S*)-**5j**.

|        | x        | y         | z        | U(eq) |
|--------|----------|-----------|----------|-------|
| H(2)   | 4234     | 5750      | 3216     | 90    |
| H(2A)  | 2110(80) | 1090(140) | 5460(70) | 89    |
| H(3)   | 2040(70) | 3460(130) | 3480(70) | 80    |
| H(4A)  | 3583     | 1102      | 3947     | 103   |
| H(4B)  | 4747     | 2821      | 4180     | 103   |
| H(5A)  | 3851     | 2137      | 7525     | 116   |
| H(5B)  | 2765     | 267       | 7296     | 116   |
| H(6)   | 2570(90) | 6240(150) | 7070(80) | 96    |
| H(8A)  | 478      | 7488      | 6014     | 157   |
| H(8B)  | 349      | 6921      | 7249     | 157   |
| H(8C)  | -210     | 5330      | 6260     | 157   |
| H(10A) | 4027     | 11665     | 1336     | 178   |
| H(10B) | 3509     | 11700     | 24       | 178   |
| H(10C) | 4590     | 9998      | 577      | 178   |
| H(11A) | 2151     | 3599      | 8272     | 123   |
| H(11B) | 1007     | 2536      | 7349     | 123   |
| H(12A) | 3221     | 6843      | -191     | 185   |
| H(12B) | 2111     | 8363      | -880     | 185   |
| H(12C) | 1703     | 6632      | -70      | 185   |
| H(13A) | 783      | 9520      | 1152     | 169   |
| H(13B) | 992      | 11041     | 170      | 169   |
| H(13C) | 1659     | 11610     | 1422     | 169   |

## References

- (1) Mizutani, N.; Chiou, W.-H.; Ojima, I. *Org. Lett.* 2002, 4, 4575-4578.
- (2) Chiou, W.-H.; Ojima, I. *Abstracts of Papers, 228th ACS National Meeting, August 22-26, 2004* 2004, ORGN-144.
- (3) Chiou, W.-H.; Mizutani, N.; Ojima, I. *Abstracts of Papers, 226th ACS National Meeting, New York, NY, United States, September 7-11, 2003*, ORGN-112.
- (4) Warshawsky, A. M.; Patel, M. V.; Chen, T.-M. *J. Org. Chem.* 1997, 62, 6439-6440.
